# Supplementary material
Source: PubMed Central journal article supplement (PMC7443947)
Supplement: pnas.2009628117.sapp.pdf [file pnas.2009628117.sapp.pdf]

Supplementary Information for:

## Genomic Analysis of Inherited Hearing Loss in the Palestinian Population

Amal Abu Rayyan, Lara Kamal, Silvia Casadei, Zippora Brownstein, Fouad Zahdeh, Hashem Shahin, Christina Canavati, Dima Dweik, Tamara Jaraysa, Grace Rabie, Ryan J. Carlson, Suleyman Gulsuner, Ming K. Lee, Karen B. Avraham, Tom Walsh, Mary-Claire King, Moien N. Kanaan

Corresponding author: Mary-Claire King, [mcking@uw.edu](mailto:mcking@uw.edu)

This PDF file includes Tables S1 to S6

**Table S1.** Genes on the sequencing panel

**Table S2. A.** Genes responsible for hearing loss in Palestinian families

**B.** Phenotypes and genotypes of all Palestinian families with genetic diagnoses for their hearing loss

**Table S3.** Hearing loss in consanguineous and non-consanguineous Palestinian families

**Table S4.** Missense mutations in Palestinian families with hearing loss

**Table S5.** Mutations with transcript effects in Palestinian families with hearing loss. Predictions using approach of Casadei et al 2019, experimentally validated for genes expressed in available tissue or cell lines

**Table S6.** Unpaired heterozygous mutations in Palestinian families with apparently recessive hearing loss

**Table S1. Genes on the sequencing panel**

| <b>Gene (OMIM)</b> | <b>SureDesign input</b> | <b>Inherit</b> | <b>Locus (OMIM)</b> | <b>Syndrome and notes</b>                                   |
|--------------------|-------------------------|----------------|---------------------|-------------------------------------------------------------|
| <i>ACTG1</i>       | <i>ACTG1</i>            | AD             | DFNA20/26           |                                                             |
| <i>ADCY1</i>       | <i>NM_021116</i>        | AR             | DFNB44              |                                                             |
| <i>ADGRV1</i>      | <i>ADGRV1</i>           | AR             |                     | Usher syndrome, type 2C                                     |
| <i>AIFM1</i>       | <i>AIFM1</i>            | XR             | DFNX5               | Auditory neuropathy                                         |
| <i>ALMS1</i>       | <i>ALMS1</i>            | AR             |                     | Alstrom syndrome                                            |
| <i>ATP2B2</i>      | <i>ATP2B2</i>           | AR             |                     | DFNB12 modifier                                             |
| <i>ATP6B1</i>      | <i>ATP6V1B1</i>         | AR             |                     | Renal tubular acidosis with deafness                        |
| <i>ATP6V1B2</i>    | <i>ATP6V1B2</i>         | AD             |                     | Deafness with onychodystrophy                               |
| <i>BCS1L</i>       | <i>BCS1L</i>            | AR             |                     | Bjornstad syndrome                                          |
| <i>BDP1</i>        | <i>BDP1</i>             | AR             | DFNB49              |                                                             |
| <i>BSND</i>        | <i>BSND</i>             | AR             | DFNB73              |                                                             |
| <i>CABP2</i>       | <i>CABP2</i>            | AR             | DFNB93              |                                                             |
| <i>CACNA1D</i>     | <i>CACNA1D</i>          | AR             |                     | Sinoatrial node dysfunction and deafness                    |
| <i>CATSPER2</i>    | <i>CATSPER2</i>         | AR             |                     | Deafness-infertility syndrome                               |
| <i>CCDC50</i>      | <i>CCDC50</i>           | AD             | DFNA44              |                                                             |
| <i>CD151</i>       | <i>CD151</i>            | AR             |                     | Nephropathy, pretibial epidermolysis bullosa, deafness      |
| <i>CD164</i>       | <i>CD164</i>            | AD             | DFNA66              |                                                             |
| <i>CDC14A</i>      | <i>CDC14A</i>           | AR             | DFNB105             | Deafness-infertility syndrome                               |
| <i>CDH23</i>       | <i>CDH23</i>            | AR             |                     | Usher syndrome, type 1D                                     |
| <i>CEACAM16</i>    | <i>CEACAM16</i>         | AD             |                     |                                                             |
| <i>CHD7</i>        | <i>NM_017780</i>        | AD             |                     | CHARGE syndrome                                             |
| <i>CIB2</i>        | <i>CIB2</i>             | AR             | DFNB48              |                                                             |
| <i>CISD2</i>       | <i>CISD2</i>            | AR             |                     | Wolfram syndrome                                            |
| <i>CLDN14</i>      | <i>CLDN14</i>           | AR             | DFNB29              |                                                             |
| <i>CLIC5</i>       | <i>CLIC5</i>            | AR             | DFNB103             |                                                             |
| <i>CLPP</i>        | <i>CLPP</i>             | AR             | DFNB81              | Perrault syndrome 3                                         |
| <i>CLRN1</i>       | <i>CLRN1</i>            | AR             |                     | Usher syndrome, type 3A                                     |
| <i>COCH</i>        | <i>COCH</i>             | AD             | DFNA9               |                                                             |
| <i>COL11A1</i>     | <i>COL11A1</i>          | AD             |                     | Stickler syndrome, type II                                  |
| <i>COL11A2</i>     | <i>COL11A2</i>          | AD,AR          | DFNB53              | Otospondylomegapiphyseal dysplasia, Stickler syndrome       |
| <i>COL2A1</i>      | <i>COL2A1</i>           | AD             |                     | Stickler syndrome, type I                                   |
| <i>COL4A3</i>      | <i>NM_000091</i>        | AD,AR          |                     | Alport syndrome                                             |
| <i>COL4A4</i>      | <i>COL4A4</i>           | AR             |                     | Alport syndrome                                             |
| <i>COL4A5</i>      | <i>COL4A5</i>           | XR             |                     | Alport syndrome                                             |
| <i>COL4A6</i>      | <i>COL4A6</i>           | XR             | DFNX6               |                                                             |
| <i>COL9A1</i>      | <i>COL9A1</i>           | AD             |                     | Stickler syndrome, type IV                                  |
| <i>COL9A2</i>      | <i>COL9A2</i>           | AR             |                     | Stickler syndrome, type V                                   |
| <i>CRYL1</i>       | <i>CRYL1</i>            | AR             |                     | large connexin deletion                                     |
| <i>CRYM</i>        | <i>CRYM</i>             | AD             |                     |                                                             |
| <i>DCDC2</i>       | <i>DCDC2</i>            | AR             | DFNB66              |                                                             |
| <i>DFNA5</i>       | <i>DFNA5</i>            | AD             | DFNA5               |                                                             |
| <i>DIAPH1</i>      | <i>DIAPH1</i>           | AD             | DFNA1               |                                                             |
| <i>DIAPH3</i>      | <i>DIAPH3</i>           | AD             |                     | Auditory Neuropathy                                         |
| <i>DMXL2</i>       | <i>DMXL2</i>            | AD             |                     |                                                             |
| <i>DNMT1</i>       | <i>DNMT1</i>            | AD             |                     | Cerebellar ataxia, deafness, and narcolepsy                 |
| <i>DSPP</i>        | <i>DSPP</i>             | AD             | DFNA39              | Deafness with dentinogenesis                                |
| <i>EDN3</i>        | <i>EDN3</i>             | AD,AR          |                     | Waardenburg syndrome, type 4B                               |
| <i>EDNRB</i>       | <i>EDNRB</i>            | AD,AR          |                     | Waardenburg syndrome, type 4A                               |
| <i>ELMOD3</i>      | <i>ELMOD3</i>           | AR             | DFNB88              |                                                             |
| <i>EPS8</i>        | <i>EPS8</i>             | AR             | DFNB102             |                                                             |
| <i>EPS8L2</i>      | <i>EPS8L2</i>           | AR             |                     |                                                             |
| <i>ERAL1</i>       | <i>ERAL1</i>            | AR             |                     | Perrault syndrome 6                                         |
| <i>ERCC2</i>       | <i>ERCC2</i>            | AR             |                     | Cerebrooculofacioskeletal syndrome 2                        |
| <i>ESPN</i>        | <i>ESPN</i>             | AR             | DFNB36              |                                                             |
| <i>ESRP1</i>       | <i>ESRP1</i>            | AR             |                     |                                                             |
| <i>ESRRB</i>       | <i>ESRRB</i>            | AR             | DFNB35              |                                                             |
| <i>EYA1</i>        | <i>EYA1</i>             | AD             |                     | Branchio-oto-renal syndrome                                 |
| <i>EYA4</i>        | <i>EYA4</i>             | AD             | DFNA10              |                                                             |
| <i>FAM65B</i>      | <i>FAM65B</i>           | AR             |                     |                                                             |
| <i>FGF3</i>        | <i>FGF3</i>             | AR             |                     | Deafness with inner ear agenesis, microtia, and microdontia |
| <i>FGFR1</i>       | <i>FGFR1</i>            | AD             |                     | Pfeiffer syndrome                                           |
| <i>FGFR2</i>       | <i>FGFR2</i>            | AD             |                     | Pfeiffer syndrome/ Crouzon syndrome                         |
| <i>FOXI1</i>       | <i>FOXI1</i>            | AR             |                     | Pendred syndrome                                            |
| <i>GATA3</i>       | <i>GATA3</i>            | AD             |                     | Hypoparathyroidism, deafness, renal (HDR) syndrome          |
| <i>GIPC3</i>       | <i>NM_133261</i>        | AR             | DFNB15/72/95        | Audiogenic Seizures                                         |
| <i>GJB2</i>        | <i>GJB2</i>             | AR             | DFNB1               |                                                             |

| Gene (OMIM)        | SureDesign input             | Inherit | Locus (OMIM)   | Syndrome and notes                                |
|--------------------|------------------------------|---------|----------------|---------------------------------------------------|
| <i>GJB2 exon 1</i> | chr13:20,766,864-20,767,146  | AR      |                |                                                   |
| <i>GJB3</i>        | <i>NM_001005752</i>          | AD      | DFNA2B         |                                                   |
| <i>GJB6</i>        | <i>GJB6</i>                  |         |                | Includes regions regulating <i>GJB2</i>           |
| <i>GPSM2</i>       | <i>GPSM2</i>                 | AR      | DFNB82         | Chudly-McCullough syndrome                        |
| <i>GREB1L</i>      | <i>GREB1L</i>                |         |                |                                                   |
| <i>GRHL2</i>       | <i>NM_024915</i>             | AD      | DFNA28         |                                                   |
| <i>GRXCR1</i>      | <i>GRXCR1</i>                | AR      | DFNB25         |                                                   |
| <i>GRXCR2</i>      | <i>GRXCR2</i>                | AR      | DFNB101        |                                                   |
| <i>HARS</i>        | <i>HARS</i>                  | AR      |                | Usher syndrome type 3B                            |
| <i>HARS2</i>       | <i>HARS2</i>                 | AR      |                | Perrault syndrome 2                               |
| <i>HGF</i>         | <i>HGF</i>                   | AR      | DFNB39         |                                                   |
| <i>HOMER2</i>      | <i>HOMER2</i>                | AD      |                |                                                   |
| <i>HSD17B4</i>     | <i>HSD17B4</i>               | AR      |                | Perrault syndrome 1                               |
| <i>ILDR1</i>       | <i>ILDR1</i>                 | AR      | DFNB42         |                                                   |
| <i>KARS</i>        | <i>KARS</i>                  | AR      | DFNB89         |                                                   |
| <i>KCNE1</i>       | <i>KCNE1</i>                 | AR      |                | Jervell and Lange-Nielsen syndrome 2              |
| <i>KCNJ10</i>      | <i>KCNJ10</i>                | AR      |                | Pendred syndrome                                  |
| <i>KCNQ1</i>       | <i>KCNQ1</i>                 | AD      |                | Long QT syndrome 1                                |
| <i>KCNQ4</i>       | <i>KCNQ4</i>                 | AD      | DFNA2A         |                                                   |
| <i>KITLG</i>       | <i>KITLG</i>                 | AD      |                | Waardenburg syndrom, type 2                       |
| <i>LARS2</i>       | <i>LARS2</i>                 | AR      |                | Perrault syndrome 4                               |
| <i>LHFPL5</i>      | <i>LHFPL5</i>                | AR      | DFNB66/67      |                                                   |
| <i>LMX1A</i>       | <i>LMX1A</i>                 |         |                |                                                   |
| <i>LOC653786</i>   |                              | -       |                | OTOA Pseudogene                                   |
| <i>LOXHD1</i>      | <i>LOXHD1</i>                | AR      | DFNB77         |                                                   |
| <i>LOXL3</i>       | <i>LOXL3</i>                 | AR      |                | possible Stickler syndrome                        |
| <i>LRTOMT</i>      | <i>LRTOMT</i>                | AR      | DFNB63         |                                                   |
| <i>MARVELD2</i>    | <i>MARVELD2</i>              | AR      | DFNB49         |                                                   |
| <i>MCM2</i>        | <i>MCM2</i>                  | AD      |                |                                                   |
| <i>MET</i>         | <i>MET</i>                   | AR      | DFNB97         |                                                   |
| <i>MIRN96</i>      | chr7:129,414,493-129,414,651 | AD      | DFNA50         |                                                   |
| <i>MITF</i>        | <i>MITF</i>                  | AD      |                | Waardenburg syndrome, type 2A                     |
| <i>MPZL2</i>       | <i>MPZL2</i>                 | AR      | DFNB111        |                                                   |
| <i>MSRB3</i>       | <i>MSRB3</i>                 | AR      | DFNB74         |                                                   |
| <i>MTRNR1</i>      | chrM:650-1603                | M       |                |                                                   |
| <i>MTTE</i>        | chrM:14675-14743             | M       |                | Maternally inherited diabetes and deafness (MIDD) |
| <i>MTTK</i>        | chrM:8296-8365               | M       |                | MERFF, MTTK                                       |
| <i>MTTL1</i>       | chrM:3231-3305               | M       |                | MERRF syndrome                                    |
| <i>MTTS1</i>       | chrM:7447-7515               | M       |                |                                                   |
| <i>MYH14</i>       | <i>MYH14</i>                 | AD      | DFNA4          |                                                   |
| <i>MYH9</i>        | <i>MYH9</i>                  | AD      | DFNA17         |                                                   |
| <i>MYO15A</i>      | <i>MYO15A</i>                | AR      | DFNB3          |                                                   |
| <i>MYO15A</i>      | chr17:18026518-18026747      | AR      |                | MYO15A exon 1A                                    |
| <i>MYO1A</i>       | <i>MYO1A</i>                 | AD      | DFNA48 ?       |                                                   |
| <i>MYO3A</i>       | <i>MYO3A</i>                 | AR      | DFNB30         |                                                   |
| <i>MYO6</i>        | <i>MYO6</i>                  | AR      | DFNB37; DFNA22 |                                                   |
| <i>MYO7A</i>       | <i>MYO7A</i>                 | AR,AD   | DFNB2; DFNA11  | Usher syndrome, type 1B                           |
| <i>NARS2</i>       | <i>NARS2</i>                 | AR      | DFNB94         |                                                   |
| <i>NDP</i>         | <i>NDP</i>                   | XLR     |                | Norrie disease                                    |
| <i>NLRP3</i>       | <i>NLRP3</i>                 | AD      |                | Muckle-Wells syndrome                             |
| <i>OPA1</i>        | <i>OPA1</i>                  | AD      |                | Optic atrophy plus syndrome                       |
| <i>OSBPL2</i>      | <i>OSBPL2</i>                | AD      | DFNA67         |                                                   |
| <i>OTOA</i>        | <i>OTOA</i>                  | AR      | DFNB22         |                                                   |
| <i>OTOF</i>        | <i>OTOF</i>                  | AR      | DFNB9          | Auditory neuropathy                               |
| <i>OTOG</i>        | <i>OTOG</i>                  | AR      | DFNB18B        |                                                   |
| <i>OTOGL</i>       | <i>OTOGL</i>                 | AR      | DFNB84         |                                                   |
| <i>P2RX2</i>       | <i>P2RX2</i>                 | AD      | DFNA41         |                                                   |
| <i>PAX3</i>        | <i>PAX3</i>                  | AD,AR   |                | Waardenburg syndrome, type 1 and type 3           |
| <i>PCDH15</i>      | <i>PCDH15</i>                | AR      |                | Usher syndrome, type 1F                           |
| <i>PDE1C</i>       | <i>PDE1C</i>                 | AD      | DFNA74 ?       |                                                   |
| <i>PDZD7</i>       | <i>PDZD7</i>                 | AR      |                | Usher syndrome, type IIC                          |
| <i>PEX1</i>        | <i>PEX1</i>                  | AR      |                | Heimler syndrome                                  |
| <i>PEX6</i>        | <i>PEX6</i>                  | AR      |                | Heimler syndrome                                  |
| <i>PJVK</i>        | <i>DFNB59</i>                | AR      | DFNB59         | Auditory neuropathy                               |
| <i>PNPT1</i>       | <i>PNPT1</i>                 | AR      | DFNB70         |                                                   |
| <i>POLR1C</i>      | <i>POLR1C</i>                | AR      |                | Treacher Collins syndrome 3                       |
| <i>POLR1D</i>      | <i>POLR1D</i>                | AD      |                | Treacher Collins syndrome 2                       |

| Gene (OMIM)        | SureDesign input | Inherit | Locus (OMIM) | Syndrome and notes            |
|--------------------|------------------|---------|--------------|-------------------------------|
| <i>POU3F4</i>      | <i>POU3F4</i>    | XR      | DFNX2        |                               |
| <i>POU4F3</i>      | <i>POU4F3</i>    | AD      | DFNA15       |                               |
| <i>PRPS1</i>       | <i>PRPS1</i>     | XR      | DFNX1        |                               |
| <i>PTPRQ</i>       | <i>PTPRQ</i>     | AR      | DFNB84       |                               |
| <i>PTRH2</i>       | <i>PTRH2</i>     | AR      |              | IMNEPD syndrome               |
| <i>RDX</i>         | <i>RDX</i>       | AR      | DFNB24       |                               |
| <i>ROR1</i>        | <i>NM_005012</i> | AR      |              |                               |
| <i>S1PR2</i>       | <i>S1PR2</i>     | AR      | DFNB68       |                               |
| <i>SEMA3E</i>      | <i>SEMA3E</i>    | AD      |              | CHARGE syndrome               |
| <i>SERPINB6</i>    | <i>SERPINB6</i>  | AR      | DFNB91       |                               |
| <i>SIX1</i>        | <i>SIX1</i>      | AD      | DFNA23       | Branchio-oto-renal syndrome   |
| <i>SIX5</i>        | <i>SIX5</i>      |         |              | Branchio-oto-renal syndrome   |
| <i>SLC17A8</i>     | <i>SLC17A8</i>   | AD      | DFNA25       |                               |
| <i>SLC22A4</i>     | <i>SLC22A4</i>   | AR      |              |                               |
| <i>SLC26A4</i>     | <i>SLC26A4</i>   | AR      |              | Pendred syndrome              |
| <i>SLC26A5</i>     | <i>SLC26A5</i>   | AR      | DFNB61       |                               |
| <i>SLITRK6</i>     | <i>SLITRK6</i>   | AR      |              | Deafness and myopia           |
| <i>SMAC/DIABLO</i> | <i>DIABLO</i>    | AD      | DFNA64       |                               |
| <i>SMPX</i>        | <i>SMPX</i>      | XR      | DFNX4        |                               |
| <i>SNAI2</i>       | <i>SNAI2</i>     | AR      |              | Waardenburg syndrome, type 2D |
| <i>SOX10</i>       | <i>SOX10</i>     | AD      |              | Waardenburg syndrome, type 4C |
| <i>STRC</i>        | <i>STRC</i>      | AR      | DFNB16       |                               |
| <i>STRCP1</i>      |                  | -       |              | STRC pseudogene               |
| <i>SYNE4</i>       | <i>SYNE4</i>     | AR      | DFNB76       |                               |
| <i>TBC1D24</i>     | <i>TBC1D24</i>   | AR,AD   | DFNA65       |                               |
| <i>TBX1</i>        | <i>TBX1</i>      | AD      |              | Velocardiofacial syndrome     |
| <i>TCOF1</i>       | <i>TCOF1</i>     | AD      |              | Treacher Collins syndrome 1   |
| <i>TECTA</i>       | <i>TECTA</i>     | AR,AD   | DFNB21       |                               |
| <i>TECTB</i>       | <i>TECTB</i>     |         |              | mouse model                   |
| <i>TIMM8A</i>      | <i>TIMM8A</i>    | XR      |              | Mohr-Tranebjaerg syndrome     |
| <i>TJP2</i>        | <i>TJP2</i>      | AD      | DFNA51       |                               |
| <i>TMC1</i>        | <i>TMC1</i>      | AR,AD   | DFNB7/11     |                               |
| <i>TMEM132E</i>    | <i>TMEM132E</i>  | AR      | DFNB99       |                               |
| <i>TMIE</i>        | <i>TMIE</i>      | AR      | DFNB6        |                               |
| <i>TMPRSS3</i>     | <i>TMPRSS3</i>   | AR      | DFNB8/10     |                               |
| <i>TNC</i>         | <i>TNC</i>       | AD      | DFNA56       |                               |
| <i>TPRN</i>        | <i>TPRN</i>      | AR      | DFNB79       |                               |
| <i>TRIOBP</i>      | <i>TRIOBP</i>    | AR      | DFNB28       |                               |
| <i>TSPEAR</i>      | <i>TSPEAR</i>    | AR      | DFNB98       |                               |
| <i>TWNK</i>        | <i>NM_021830</i> | AR      |              | Perrault syndrome 5           |
| <i>USH1C</i>       | <i>USH1C</i>     | AR      | DFNB18       | Usher syndrome, type 1C       |
| <i>USH1G</i>       | <i>USH1G</i>     | AR      |              | Usher syndrome, type 1G       |
| <i>USH2A</i>       | <i>USH2A</i>     | AR      |              | Usher syndrome, type 2A       |
| <i>WBP2</i>        | <i>WBP2</i>      | AR      |              |                               |
| <i>WFS1</i>        | <i>WFS1</i>      | AD      | DFNA6/14/38  | Wolfram syndrome              |
| <i>WHRN</i>        | <i>DFNB31</i>    | AR      | DFNB31       | Usher syndrome, type 2D       |

**Table S2A. Genes responsible for hearing loss in Palestinian families**

| Gene            | Number of families | Number of different mutations | Phenotype           |
|-----------------|--------------------|-------------------------------|---------------------|
| <i>ADGRV1</i>   | 4                  | 3                             | Usher 2C            |
| <i>CACNA1D</i>  | 4                  | 1                             | SANDD               |
| <i>CDC14A</i>   | 1                  | 1                             | DFNB32              |
| <i>CDH23</i>    | 17                 | 10                            | DFNB12 / Usher 1D   |
| <i>CLDN14</i>   | 8                  | 2                             | DFNB29              |
| <i>CLPP</i>     | 1                  | 1                             | Perrault syn        |
| <i>COCH</i>     | 1                  | 1                             | DFNA9               |
| <i>COL11A2</i>  | 1                  | 1                             | DFNB53              |
| <i>COL4A6</i>   | 1                  | 1                             | DFNX6               |
| <i>DFNA5</i>    | 1                  | 1                             | DFNA5               |
| <i>EDNRB</i>    | 2                  | 2                             | Waardenburg syn     |
| <i>EPS8L2</i>   | 2                  | 2                             | DFNB106             |
| <i>ESPN</i>     | 2                  | 2                             | DFNB36              |
| <i>ESRRB</i>    | 3                  | 2                             | DFNB35              |
| <i>GIPC3</i>    | 1                  | 1                             | DFNB15 /JAMS        |
| <i>GJB2</i>     | 74                 | 7                             | DFNB1A              |
| <i>GPSM2</i>    | 5                  | 4                             | DFNB82 / CMCS       |
| <i>HSD17B4</i>  | 1                  | 1                             | Perrault syn        |
| <i>ILDR1</i>    | 3                  | 2                             | DFNB42              |
| <i>LARS2</i>    | 4                  | 1                             | Perrault syn        |
| <i>LHFPL5</i>   | 2                  | 2                             | DFNB67              |
| <i>LOXHD1</i>   | 2                  | 2                             | DFNB77              |
| <i>LRTOMT</i>   | 1                  | 1                             | DFNB63              |
| <i>MARVELD2</i> | 1                  | 1                             | DFNB49              |
| <i>MYO3A</i>    | 1                  | 1                             | DFNB30              |
| <i>MYO6</i>     | 5                  | 2                             | DFNB37 / DFNA22     |
| <i>MYO7A</i>    | 28                 | 15                            | DFNB2 / DFNA11      |
| <i>MYO15A</i>   | 37                 | 15                            | DFNB3               |
| <i>OTOA</i>     | 8                  | 5                             | DFNB22              |
| <i>OTOF</i>     | 3                  | 3                             | AUNB1               |
| <i>PAX3</i>     | 6                  | 3                             | Waardenburg syn     |
| <i>PCDH15</i>   | 7                  | 2                             | DFNB23              |
| <i>PJVK</i>     | 2                  | 1                             | DFNB59              |
| <i>POU3F4</i>   | 2                  | 1                             | DFNX2               |
| <i>POU4F3</i>   | 2                  | 2                             | DFNA15              |
| <i>PTPRQ</i>    | 3                  | 2                             | DFNB84A             |
| <i>PTRH2</i>    | 2                  | 1                             | IMNEPED             |
| <i>RDX</i>      | 1                  | 1                             | DFNB24              |
| <i>SLC26A4</i>  | 30                 | 14                            | DFNB4 / Pendred syn |
| <i>STRC</i>     | 1                  | 1                             | DFNB16              |
| <i>TBC1D24</i>  | 1                  | 1                             | DFNB86 / DOORS      |
| <i>TECTA</i>    | 9                  | 3                             | DFNB21              |
| <i>TMC1</i>     | 4                  | 4                             | DFNB7               |
| <i>TMPRSS3</i>  | 15                 | 6                             | DFNB8/10            |
| <i>TRIOBP</i>   | 21                 | 4                             | DFNB28              |
| <i>USH1C</i>    | 2                  | 1                             | Usher 1C / DFNB18A  |
| <i>USH1G</i>    | 2                  | 2                             | Usher 1G            |
| <i>USH2A</i>    | 3                  | 1                             | Usher 2A            |
| Total           | 337                | 143                           |                     |

## Abbreviations:

AUNB1: Auditory neuropathy

CMCS: Chudley-McCullough syndrome

DOORS: Deafness, onychodystrophy, osteodystrophy, MR, and seizures

IMNEPED: Infantile-onset multisystem neurologic, endocrine, pancreatic disease

JAMS1: Juvenile audiogenic monogenic seizures

SANDD: Synoatrial node dysfunction

**Table S2B. Phenotypes and genotypes of all families with genetic diagnoses for their hearing loss**

| Family        | City       | Consang | Single / multi HL | Aff in family | Inherit | Onset pre-lingual | Synd | Hearing loss                   | New / known allele | Geno type | Gene           | cDNA                    | Protein                            | hg19 position                  |
|---------------|------------|---------|-------------------|---------------|---------|-------------------|------|--------------------------------|--------------------|-----------|----------------|-------------------------|------------------------------------|--------------------------------|
| CX            | Ramallah   | yes     | multi             | 2             | AR      | pre               |      | moderate to severe             | new                | homoz     | <i>ADGRV1</i>  | c.2898G>A               | p.(Glu966Glu)                      | chr5:89940686                  |
| JO            | Ramallah   | yes     | multi             | 2             | AR      | pre               |      | moderate                       | new                | homoz     | <i>ADGRV1</i>  | c.2898G>A               | p.(Glu966Glu)                      | chr5:89940686                  |
| EI            | Bethlehem  | yes     | multi             | 3             | AR      | pre               |      | moderate to severe             | new                | homoz     | <i>ADGRV1</i>  | c.10426 G>A             | p.(Gly3476Arg)                     | chr5:90024750                  |
| IJ            | Bethlehem  | yes     | multi             | 2             | AR      | pre               | yes  | moderate to severe             | new                | homoz     | <i>ADGRV1</i>  | c.14315C>A              | p.(Ser4772*)                       | chr5:90086961                  |
| CT            | Bethlehem  | yes     | multi             | 4             | AR      | pre               | yes  | moderate; cardiac signs        | new                | homoz     | <i>CACNA1D</i> | c.1127C>T               | p.(Ala376Val)                      | chr3:53707750                  |
| HN            | Jersusalem | yes     | sing              | 1             | AR      | pre               | yes  | moderate; prolonged AV conduc  | new                | homoz     | <i>CACNA1D</i> | c.1127C>T               | p.(Ala376Val)                      | chr3:53707750                  |
| QS051-052     | Qalqilia   | yes     | sing              | 1             | AR      | pre               |      |                                | new                | homoz     | <i>CACNA1D</i> | c.1127C>T               | p.(Ala376Val)                      | chr3:53707750                  |
| X16-17        | Jersusalem | yes     | multi             | 2             | AR      | pre               |      |                                | new                | homoz     | <i>CACNA1D</i> | c.1127C>T               | p.(Ala376Val)                      | chr3:53707750                  |
| Q-N           | Tulkarm    | yes     | multi             | 4             | AR      | pre               |      | severe                         | new                | homoz     | <i>CDC14A</i>  | c.51-1G>T               | p.(?)                              | chr1:100819317                 |
| FO            | Nablus     | yes     | multi             | 2             | AR      | pre               |      | profound                       | known              | homoz     | <i>CDH23</i>   | c.683A>T                | p.(Asp228Val)                      | chr10:73330605                 |
| AS-KK         | Jenin      | yes     | sing              | 1             | AR      | pre               |      |                                | known              | homoz     | <i>CDH23</i>   | c.1036C>T               | p.(Pro346Ser)                      | chr10:73377052                 |
| DW            | Ramallah   | yes     | multi             | 2             | AR      | pre               |      | severe to profound             | known              | homoz     | <i>CDH23</i>   | c.1036C>T               | p.(Pro346Ser)                      | chr10:73377052                 |
| G             | Hebron     | yes     | multi             | 5             | AR      | pre               |      | severe to profound             | known              | homoz     | <i>CDH23</i>   | c.1036C>T               | p.(Pro346Ser)                      | chr10:73377052                 |
| DA (EP5-7)    | Ramallah   | yes     | multi             | 3             | AR      | pre               |      | moderate                       | known              | homoz     | <i>CDH23</i>   | c.1037C>T               | p.(Pro346Ser)                      | chr10:73377053                 |
| AA-N          | Jenin      | yes     | multi             | 4             | AR      | pre               |      | severe to profound             | known              | homoz     | <i>CDH23</i>   | c.1675C>T               | p.(Pro559Ser)                      | chr10:73437373                 |
| GA-D          | Gaza       | yes     | multi             | 2             | AR      | pre               |      | moderate                       | known              | homoz     | <i>CDH23</i>   | c.1675C>T               | p.(Pro559Ser)                      | chr10:73437373                 |
| AB            | Ramallah   | no      | multi             | 6             | AR      | pre               |      | moderate                       | known              | cpd het   | <i>CDH23</i>   | c.[(1675C>T);(3211G>A)] | p.(Pro559Ser);(Glu1071Lys)]        | chr10:73437373; chr10:73468959 |
| EE            | Ramallah   | yes     | multi             | 2             | AR      | pre               |      | moderate                       | known              | homoz     | <i>CDH23</i>   | c.3211G>A               | p.(Glu1071Lys)                     | chr10:73468959                 |
| HS8           | Ramallah   | yes     | sing              | 1             | AR      | pre               |      |                                | known              | homoz     | <i>CDH23</i>   | c.3211G>A               | p.(Glu1071Lys)                     | chr10:73468959                 |
| EG            | Hebron     | yes     | multi             | 3             | AR      | pre               |      | profound                       | new                | homoz     | <i>CDH23</i>   | c.4562A>G               | p.(Asn1521Ser)                     | chr10:73500652                 |
| EPIC          | Bethlehem  | yes     | multi             | 3             | AR      | pre               | yes  | profound, RP, epilepsy         | new                | homoz     | <i>CDH23</i>   | c.5749G>A               | p.(Glu1917Lys)                     | chr10:73545424                 |
| A151          | Jersusalem | yes     | sing              | 1             | AR      | pre               |      | moderate                       | known              | homoz     | <i>CDH23</i>   | c.6614C>T               | p.(Pro2205Leu)                     | chr10:73553299                 |
| IP            | Nablus     | yes     | sing              | 1             | AR      | pre               |      | moderate to severe             | known              | homoz     | <i>CDH23</i>   | c.6614C>T               | p.(Pro2205Leu)                     | chr10:73553299                 |
| DF (EP10-12)  | Bethlehem  | yes     | multi             | 2             | AR      | pre               |      |                                | new                | homoz     | <i>CDH23</i>   | c.8140G>T               | p.(Asp2714Tyr)                     | chr10:73566000                 |
| BV3 (EP23-24) | Jersusalem | yes     | multi             | 3             | AR      | pre               |      | profound                       | new                | homoz     | <i>CDH23</i>   | c.8204T>C               | p.(Leu2735Pro)                     | chr10:73567059                 |
| EP25          | Bethlehem  | yes     | sing              | 1             | AR      | pre               |      | severe to profound             | new                | homoz     | <i>CDH23</i>   | c.8204T>C               | p.(Leu2735Pro)                     | chr10:73567059                 |
| X13           | Jersusalem | yes     | sing              | 1             | AR      | pre               |      |                                | new                | homoz     | <i>CLDN14</i>  | c.664delG               | p.(Ala222Profs*4)                  | chr21:37833330                 |
| AA-G          | Jenin      | yes     | multi             | 3             | AR      | pre               |      | severe to profound             | known              | homoz     | <i>CLDN14</i>  | c.83C>T                 | p.(Pro28Leu)                       | chr21:37833911                 |
| AA-K          | Jenin      | yes     | multi             | 3             | AR      | pre               |      | severe to profound             | known              | homoz     | <i>CLDN14</i>  | c.83C>T                 | p.(Pro28Leu)                       | chr21:37833911                 |
| AA-O          | Jenin      | yes     | sing              | 1             | AR      | pre               |      | severe to profound             | known              | homoz     | <i>CLDN14</i>  | c.83C>T                 | p.(Pro28Leu)                       | chr21:37833911                 |
| AS-X          | Jenin      | yes     | multi             | 5             | AR      | pre               |      |                                | known              | homoz     | <i>CLDN14</i>  | c.83C>T                 | p.(Pro28Leu)                       | chr21:37833911                 |
| DB            | Hebron     | yes     | multi             | 3             | AR      | pre               |      | severe to profound             | known              | homoz     | <i>CLDN14</i>  | c.83C>T                 | p.(Pro28Leu)                       | chr21:37833911                 |
| QS039         | Qalqilia   | yes     | sing              | 1             | AR      | pre               |      | severe to profound             | known              | homoz     | <i>CLDN14</i>  | c.83C>T                 | p.(Pro28Leu)                       | chr21:37833911                 |
| FN            | Jenin      | yes     | multi             | 3             | AR      | pre               |      | profound w/mild MR, DD         | known              | homoz     | <i>CLDN14</i>  | c.83C>T                 | p.(Pro28Leu)                       | chr21:37833911                 |
| GA-H          | Gaza       | yes     | multi             | 3             | AR      | pre               |      | severe to profound             | new                | homoz     | <i>CLPP</i>    | c.270+3G>T              | p.(?)                              | chr19:6361954                  |
| CO            | Jenin      | no      | multi             | 9             | AD      | post              |      | progressive, onset 20-30y      | new                | het       | <i>COCH</i>    | c.1625G>C               | p.(Cys542Ser)                      | chr14:31358969                 |
| Q-U           | Tulkarm    | yes     | multi             | 4             | AR      | pre               | yes  | severe with joint problems     | new                | homoz     | <i>COL11A2</i> | c.3080G>A               | p.(Gly1027Glu)                     | chr6:33139560                  |
| AS-CC         | Jenin      | yes     | sing              | 1             | XR      | pre               |      | any cochlear malformation?     | new                | hemiz     | <i>COL4A6</i>  | c.1549C>T               | p.(Arg517*)                        | chrX:107431785                 |
| BL            | Nablus     | no      | multi             | 5             | AD      | post              |      | progressive, onset ~17y        | known              | het       | <i>FNFA5</i>   | c.991-15_991-13del      | p.(?)                              | chr7:24746008                  |
| Q-R           | Tulkarm    | yes     | sing              | 1             | AD      | pre               | yes  | severe w/ Waardenberg          | new                | het       | <i>EDNRB</i>   | c.1071+2T>C             | p.(?)                              | chr13:78477289                 |
| JS            | Tulkarm    | yes     | sing              | 1             | AR      | pre               | yes  | Waardenberg syndrome           | new                | homoz     | <i>EDNRB</i>   | c.823G>A                | p.(Val275Met)                      | chr13:78477673                 |
| IW            | Nablus     | yes     | multi             | 3             | AR      | pre               |      |                                | new                | homoz     | <i>EPSL2</i>   | c.148insGGACA           | p.(Ser50Trpfs*34)                  | chr11:710469                   |
| GX            | Nablus     | yes     | multi             | 4             | AR      | post              |      | progressive, onset ~6y         | new                | homoz     | <i>EPSL2</i>   | c.1430dup               | p.(Val478Serfs*25)                 | chr11:723327                   |
| AA-E          | Jenin      | yes     | sing              | 1             | AR      | pre               |      | profound                       | new                | homoz     | <i>ESPN</i>    | c.2081_2082del          | p.(Ser694Cysfs*51)                 | chr1:6511911                   |
| Q-S           | Tulkarm    | yes     | sing              | 1             | AD      | post              |      | progressive, moderate          | known              | het       | <i>ESPN</i>    | c.2155A>C               | p.(Ser719Arg)                      | chr1:6511986                   |
| BP            | Jersusalem | yes     | multi             | 3             | AR      | pre               |      | severe to profound             | new                | homoz     | <i>ESRRB</i>   | c.545G>A                | p.(Arg182His)                      | chr14:76948389                 |
| AS-S          | Jenin      | yes     | multi             | 2             | AR      | pre               |      |                                | new                | homoz     | <i>ESRRB</i>   | c.787G>A                | p.(Gly263Ser)                      | chr14:76949102                 |
| FT            | Jenin      | yes     | multi             | 3             | AR      | pre               |      | profound                       | new                | homoz     | <i>ESRRB</i>   | c.787G>A                | p.(Gly263Ser)                      | chr14:76949102                 |
| AA-F          | Jenin      | yes     | multi             | 2             | AR      | pre               | yes  | severe to profound w/ epilepsy | known              | homoz     | <i>GIPC3</i>   | c.122C>A                | p.(Thr41Lys)                       | chr19:3585717                  |
| AS-C          | Jenin      | yes     | sing              | 1             | AR      | pre               |      |                                | known              | homoz     | <i>GJB2</i>    | c.358_360delGAG         | p.(Glu120del)                      | chr13:20763361                 |
| GV            | Jenin      | yes     | sing              | 1             | AR      | pre               |      | severe to profound             | known              | homoz     | <i>GJB2</i>    | c.358_360delGAG         | p.(Glu120del)                      | chr13:20763361                 |
| DG            | Jersusalem | yes     | multi             | 3             | AR      | pre               |      | severe to profound             | known              | homoz     | <i>GJB2</i>    | c.235delC               | p.(Leu79Cysfs*3)                   | chr13:20763486                 |
| FM            | Hebron     | yes     | multi             | 2             | AR      | pre               |      | severe to profound             | known              | homoz     | <i>GJB2</i>    | c.235delC               | p.(Leu79Cysfs*3)                   | chr13:20763486                 |
| IZ            | Hebron     | yes     | sing              | 1             | AR      | pre               |      | moderate to severe             | known              | homoz     | <i>GJB2</i>    | c.235delC               | p.(Leu79Cysfs*3)                   | chr13:20763486                 |
| X33           | Jersusalem | yes     | sing              | 1             | AR      | pre               |      |                                | known              | homoz     | <i>GJB2</i>    | c.235delC               | p.(Leu79Cysfs*3)                   | chr13:20763486                 |
| X18           | Jersusalem | no      | sing              | 1             | AR      | pre               |      |                                | known              | cpd het   | <i>GJB2</i>    | c.[(235delC);(290insA)] | p.[(Leu79Cysfs*3);(Arg98Thrfs*15)] | chr13:20763486; chr10:20763430 |
| X23           | Jersusalem | no      | sing              | 1             | AR      | pre               |      |                                | known              | cpd het   | <i>GJB2</i>    | c.[(235delC);(290insA)] | p.[(Leu79Cysfs*3);(Arg98Thrfs*15)] | chr13:20763486; chr10:20763430 |
| B6-7          | Hebron     | yes     | sing              | 1             | AR      | pre               |      | severe to profound             | known              | homoz     | <i>GJB2</i>    | c.229T>C                | p.(Trp77Arg)                       | chr13:20763492                 |
| AF            | Hebron     | yes     | multi             | 3             | AR      | pre               |      |                                | known              | homoz     | <i>GJB2</i>    | c.167delT               | p.(Leu56Argfs*26)                  | chr13:20763554                 |
| L             | Hebron     | yes     | multi             | 6             | AR      | pre               |      |                                | known              | homoz     | <i>GJB2</i>    | c.167delT               | p.(Leu56Argfs*26)                  | chr13:20763554                 |
| S             | Hebron     | yes     | multi             | 17            | AR      | pre               |      | severe to profound             | known              | homoz     | <i>GJB2</i>    | c.167delT               | p.(Leu56Argfs*26)                  | chr13:20763554                 |
| X6            | Jersusalem | yes     | sing              | 1             | AR      | pre               |      | severe to profound             | known              | homoz     | <i>GJB2</i>    | c.167delT               | p.(Leu56Argfs*26)                  | chr13:20763554                 |
| α16           | Hebron     | yes     | sing              | 1             | AR      | pre               |      | severe to profound             | known              | homoz     | <i>GJB2</i>    | c.167delT               | p.(Leu56Argfs*26)                  | chr13:20763554                 |

| Family    | City      | Consang | Single / multi HL | Aff in family | Inherit | Onset pre-lingual | Synd | Hearing loss            | New / known allele | Geno type | Gene           | cDNA                      | Protein                             | hg19 position                  |
|-----------|-----------|---------|-------------------|---------------|---------|-------------------|------|-------------------------|--------------------|-----------|----------------|---------------------------|-------------------------------------|--------------------------------|
| α31       | Hebron    | yes     | sing              | 1             | AR      | pre               |      | severe to profound      | known              | homoz     | <i>GJB2</i>    | c.167delT                 | p.(Leu56Argfs*26)                   | chr13:20763554                 |
| GI        | Hebron    | yes     | multi             | 2             | AR      | pre               |      | severe to profound      | known              | cpd het   | <i>GJB2</i>    | c.[(167delT);(c.235delC)] | p.[(Leu56Argfs*26); (Leu79Cysfs*3)] | chr13:20763554; chr10:20763486 |
| D         | Hebron    | yes     | multi             | 8             | AR      | pre               |      | severe to profound      | known              | cpd het   | <i>GJB2</i>    | c.[(167delT);(c.235delC)] | p.[(Leu56Argfs*26); (Leu79Cysfs*3)] | chr13:20763554; chr10:20763486 |
| A127-129  | Jersualem | yes     | sing              | 1             | AR      | pre               |      | severe to profound      | known              | homoz     | <i>GJB2</i>    | c.35delG                  | p.(Gly12Valfs*2)                    | chr13:20763686                 |
| AA        | Hebron    | yes     | sing              | 1             | AR      | pre               |      | severe to profound      | known              | homoz     | <i>GJB2</i>    | c.35delG                  | p.(Gly12Valfs*2)                    | chr13:20763686                 |
| AA-C      | Jenin     | yes     | multi             | 3             | AR      | pre               |      |                         | known              | homoz     | <i>GJB2</i>    | c.35delG                  | p.(Gly12Valfs*2)                    | chr13:20763686                 |
| AA-I      | Jenin     | yes     | sing              | 1             | AR      | pre               |      |                         | known              | homoz     | <i>GJB2</i>    | c.35delG                  | p.(Gly12Valfs*2)                    | chr13:20763686                 |
| AA-J      | Jenin     | yes     | sing              | 1             | AR      | pre               |      |                         | known              | homoz     | <i>GJB2</i>    | c.35delG                  | p.(Gly12Valfs*2)                    | chr13:20763686                 |
| AA-M      | Jenin     | yes     | sing              | 1             | AR      | pre               |      |                         | known              | homoz     | <i>GJB2</i>    | c.35delG                  | p.(Gly12Valfs*2)                    | chr13:20763686                 |
| AA-P      | Jenin     | yes     | multi             | 2             | AR      | pre               |      |                         | known              | homoz     | <i>GJB2</i>    | c.35delG                  | p.(Gly12Valfs*2)                    | chr13:20763686                 |
| AA-R      | Jenin     | yes     | sing              | 1             | AR      | pre               |      |                         | known              | homoz     | <i>GJB2</i>    | c.35delG                  | p.(Gly12Valfs*2)                    | chr13:20763686                 |
| AA-Y      | Jenin     | yes     | multi             | 2             | AR      | pre               |      |                         | known              | homoz     | <i>GJB2</i>    | c.35delG                  | p.(Gly12Valfs*2)                    | chr13:20763686                 |
| AA-Z      | Jenin     | yes     | sing              | 1             | AR      | pre               |      |                         | known              | homoz     | <i>GJB2</i>    | c.35delG                  | p.(Gly12Valfs*2)                    | chr13:20763686                 |
| AC        | Hebron    | yes     | sing              | 1             | AR      | pre               |      | profound                | known              | homoz     | <i>GJB2</i>    | c.35delG                  | p.(Gly12Valfs*2)                    | chr13:20763686                 |
| AQ        | Tulkarem  | yes     | sing              | 1             | AR      | pre               |      | severe to profound      | known              | homoz     | <i>GJB2</i>    | c.35delG                  | p.(Gly12Valfs*2)                    | chr13:20763686                 |
| AS        | Hebron    | yes     | multi             | 2             | AR      | pre               |      | profound                | known              | homoz     | <i>GJB2</i>    | c.35delG                  | p.(Gly12Valfs*2)                    | chr13:20763686                 |
| AS-D      | Jenin     | yes     | sing              | 1             | AR      | pre               |      |                         | known              | homoz     | <i>GJB2</i>    | c.35delG                  | p.(Gly12Valfs*2)                    | chr13:20763686                 |
| AS-DD     | Jenin     | yes     | multi             | 4             | AR      | pre               |      |                         | known              | homoz     | <i>GJB2</i>    | c.35delG                  | p.(Gly12Valfs*2)                    | chr13:20763686                 |
| AS-G      | Jenin     | yes     | sing              | 1             | AR      | pre               |      |                         | known              | homoz     | <i>GJB2</i>    | c.35delG                  | p.(Gly12Valfs*2)                    | chr13:20763686                 |
| AS-U      | Jenin     | yes     | multi             | 2             | AR      | pre               |      |                         | known              | homoz     | <i>GJB2</i>    | c.35delG                  | p.(Gly12Valfs*2)                    | chr13:20763686                 |
| AS-Y      | Jenin     | yes     | sing              | 1             | AR      | pre               |      |                         | known              | homoz     | <i>GJB2</i>    | c.35delG                  | p.(Gly12Valfs*2)                    | chr13:20763686                 |
| B3-5      | Hebron    | yes     | multi             | 2             | AR      | pre               |      |                         | known              | homoz     | <i>GJB2</i>    | c.35delG                  | p.(Gly12Valfs*2)                    | chr13:20763686                 |
| BN        | Bethlehem | yes     | multi             | 4             | AR      | pre               |      | severe to profound      | known              | homoz     | <i>GJB2</i>    | c.35delG                  | p.(Gly12Valfs*2)                    | chr13:20763686                 |
| BO        | Hebron    | yes     | sing              | 1             | AR      | pre               |      | severe to profound      | known              | homoz     | <i>GJB2</i>    | c.35delG                  | p.(Gly12Valfs*2)                    | chr13:20763686                 |
| BS        | Bethlehem | yes     | sing              | 1             | AR      | pre               |      | severe to profound      | known              | homoz     | <i>GJB2</i>    | c.35delG                  | p.(Gly12Valfs*2)                    | chr13:20763686                 |
| CE        | Jenin     | yes     | multi             | 5             | AR      | pre               |      | severe to profound      | known              | homoz     | <i>GJB2</i>    | c.35delG                  | p.(Gly12Valfs*2)                    | chr13:20763686                 |
| CP        | Hebron    | yes     | multi             | 2             | AR      | pre               |      | severe to profound      | known              | homoz     | <i>GJB2</i>    | c.35delG                  | p.(Gly12Valfs*2)                    | chr13:20763686                 |
| CW        | Jenin     | yes     | multi             | 2             | AR      | pre               |      | severe to profound      | known              | homoz     | <i>GJB2</i>    | c.35delG                  | p.(Gly12Valfs*2)                    | chr13:20763686                 |
| DM        | Hebron    | yes     | multi             | 3             | AR      | pre               |      |                         | known              | homoz     | <i>GJB2</i>    | c.35delG                  | p.(Gly12Valfs*2)                    | chr13:20763686                 |
| EP1-4     | Bethlehem | yes     | multi             | 4             | AR      | pre               |      | severe to profound      | known              | homoz     | <i>GJB2</i>    | c.35delG                  | p.(Gly12Valfs*2)                    | chr13:20763686                 |
| FI        | Jersualem | no      | multi             | 3             | AR      | pre               |      | severe to profound      | known              | homoz     | <i>GJB2</i>    | c.35delG                  | p.(Gly12Valfs*2)                    | chr13:20763686                 |
| FJ        | Jersualem | yes     | multi             | 6             | AR      | pre               |      | severe                  | known              | homoz     | <i>GJB2</i>    | c.35delG                  | p.(Gly12Valfs*2)                    | chr13:20763686                 |
| FR        | Hebron    | yes     | multi             | 5             | AR      | pre               |      | severe to profound      | known              | homoz     | <i>GJB2</i>    | c.35delG                  | p.(Gly12Valfs*2)                    | chr13:20763686                 |
| FS        | Salfeet   | yes     | multi             | 3             | AR      | pre               |      | severe to profound      | known              | homoz     | <i>GJB2</i>    | c.35delG                  | p.(Gly12Valfs*2)                    | chr13:20763686                 |
| GA-L      | Gaza      | yes     | multi             | 2             | AR      | pre               |      |                         | known              | homoz     | <i>GJB2</i>    | c.35delG                  | p.(Gly12Valfs*2)                    | chr13:20763686                 |
| GC        | Hebron    | yes     | multi             | 6             | AR      | pre               |      | severe to profound      | known              | homoz     | <i>GJB2</i>    | c.35delG                  | p.(Gly12Valfs*2)                    | chr13:20763686                 |
| GG        | Qalqilia  | yes     | multi             | 2             | AR      | pre               |      | moderate                | known              | homoz     | <i>GJB2</i>    | c.35delG                  | p.(Gly12Valfs*2)                    | chr13:20763686                 |
| GK        | Hebron    | yes     | sing              | 1             | AR      | pre               |      | severe to profound      | known              | homoz     | <i>GJB2</i>    | c.35delG                  | p.(Gly12Valfs*2)                    | chr13:20763686                 |
| HE        | Nablus    | no      | sing              | 1             | AR      | pre               |      | severe to profound      | known              | homoz     | <i>GJB2</i>    | c.35delG                  | p.(Gly12Valfs*2)                    | chr13:20763686                 |
| HO        | Jenin     | yes     | multi             | 2             | AR      | pre               |      | severe to profound      | known              | homoz     | <i>GJB2</i>    | c.35delG                  | p.(Gly12Valfs*2)                    | chr13:20763686                 |
| HS1       | Ramallah  | yes     | sing              | 1             | AR      | pre               |      | severe to profound      | known              | homoz     | <i>GJB2</i>    | c.35delG                  | p.(Gly12Valfs*2)                    | chr13:20763686                 |
| HS4       | Ramallah  | yes     | sing              | 1             | AR      | pre               |      | severe to profound      | known              | homoz     | <i>GJB2</i>    | c.35delG                  | p.(Gly12Valfs*2)                    | chr13:20763686                 |
| IN        | Nablus    | yes     | sing              | 1             | AR      | pre               |      | profound                | known              | homoz     | <i>GJB2</i>    | c.35delG                  | p.(Gly12Valfs*2)                    | chr13:20763686                 |
| JD        | Ramallah  | yes     | multi             | 2             | AR      | pre               |      | moderate                | known              | homoz     | <i>GJB2</i>    | c.35delG                  | p.(Gly12Valfs*2)                    | chr13:20763686                 |
| JG        | Bethlehem | yes     | sing              | 1             | AR      | pre               |      | moderate                | known              | homoz     | <i>GJB2</i>    | c.35delG                  | p.(Gly12Valfs*2)                    | chr13:20763686                 |
| JI        | Bethlehem | yes     | multi             | 3             | AR      | pre               |      | moderate to severe      | known              | homoz     | <i>GJB2</i>    | c.35delG                  | p.(Gly12Valfs*2)                    | chr13:20763686                 |
| Q-A       | Tulkarm   | yes     | sing              | 1             | AR      | pre               |      |                         | known              | homoz     | <i>GJB2</i>    | c.35delG                  | p.(Gly12Valfs*2)                    | chr13:20763686                 |
| Q-E       | Tulkarm   | yes     | multi             | 4             | AR      | pre               |      | severe to profound      | known              | homoz     | <i>GJB2</i>    | c.35delG                  | p.(Gly12Valfs*2)                    | chr13:20763686                 |
| Q-M       | Tulkarm   | yes     | multi             | 2             | AR      | pre               |      |                         | known              | homoz     | <i>GJB2</i>    | c.35delG                  | p.(Gly12Valfs*2)                    | chr13:20763686                 |
| QS036-037 | Qalqilia  | yes     | sing              | 1             | AR      | pre               |      | severe to profound      | known              | homoz     | <i>GJB2</i>    | c.35delG                  | p.(Gly12Valfs*2)                    | chr13:20763686                 |
| X29       | Jersualem | yes     | sing              | 1             | AR      | pre               |      |                         | known              | homoz     | <i>GJB2</i>    | c.35delG                  | p.(Gly12Valfs*2)                    | chr13:20763686                 |
| α36       | Hebron    | yes     | sing              | 1             | AR      | pre               |      | severe to profound      | known              | homoz     | <i>GJB2</i>    | c.35delG                  | p.(Gly12Valfs*2)                    | chr13:20763686                 |
| FP        | Ramallah  | no      | sing              | 1             | AR      | pre               |      | severe to profound      | known              | cpd het   | <i>GJB2</i>    | c.[(35delG);(c.235delC)]  | p.((Gly12Valfs*2);(Leu79Cysfs*3))   | chr13:20763686; chr13:20763486 |
| HV        | Hebron    | yes     | multi             | 2             | AR      | pre               |      | severe to profound      | known              | cpd het   | <i>GJB2</i>    | c.[(35delG);(c.235delC)]  | p.((Gly12Valfs*2);(Leu79Cysfs*3))   | chr13:20763686; chr13:20763486 |
| J1-2      | Hebron    | yes     | sing              | 1             | AR      | pre               |      |                         | known              | cpd het   | <i>GJB2</i>    | c.[(35delG);(c.235delC)]  | p.((Gly12Valfs*2);(Leu79Cysfs*3))   | chr13:20763686; chr13:20763486 |
| X37-38    | Jersualem | no      | multi             | 2             | AR      | pre               |      |                         | known              | cpd het   | <i>GJB2</i>    | c.[(35delG);(c.235delC)]  | p.((Gly12Valfs*2);(Leu79Cysfs*3))   | chr13:20763686; chr13:20763486 |
| GO        | Jenin     | no      | multi             | 2             | AR      | pre               |      | severe to profound      | known              | cpd het   | <i>GJB2</i>    | c.[(35delG);(c.-23+1G>A)] | p.((Gly12Valfs*2);(?))              | chr13:20763686; chr13:20766921 |
| IK        | Bethlehem | no      | multi             | 2             | AR      | pre               |      | moderate to severe      | known              | cpd het   | <i>GJB2</i>    | c.[(35delG);(c.-23+1G>A)] | p.((Gly12Valfs*2);(?))              | chr13:20763686; chr13:20766921 |
| J3-5      | Hebron    | yes     | multi             | 2             | AR      | pre               |      |                         | known              | cpd het   | <i>GJB2</i>    | c.[(35delG);(c.-23+1G>A)] | p.((Gly12Valfs*2);(?))              | chr13:20763686; chr13:20766921 |
| X12       | Jersualem | yes     | sing              | 1             | AR      | pre               |      |                         | known              | homoz     | <i>GJB2</i>    | c.-23+1G>A                | p.(?)                               | chr13:20766921                 |
| GZ        | Hebron    | yes     | sing              | 1             | AR      | pre               |      | severe                  | known              | homoz     | <i>GPSM2</i>   | c.832C>T                  | p.(Arg278*)                         | chr1:109444446                 |
| GA-N      | Gaza      | yes     | sing              | 1             | AR      | pre               |      | severe to profound      | known              | homoz     | <i>GPSM2</i>   | c.977G>A                  | p.(Trp326*)                         | chr1:109445771                 |
| α33       | Hebron    | yes     | multi             | 6             | AR      | pre               |      | severe to profound      | known              | homoz     | <i>GPSM2</i>   | c.977G>A                  | p.(Trp326*)                         | chr1:109445771                 |
| CC        | Bethlehem | yes     | sing              | 1             | AR      | pre               |      |                         | known              | homoz     | <i>GPSM2</i>   | c.1492C>T                 | p.(Arg498*)                         | chr1:109465090                 |
| CG        | Qalqilia  | yes     | multi             | 13            | AR      | pre               | yes  | severe to profound w/ID | known              | homoz     | <i>GPSM2</i>   | c.379C>T                  | p.(Arg127*)                         | chr1:109440214                 |
| EY        | Nablus    | yes     | sing              | 1             | AR      | pre               |      | severe to profound      | new                | homoz     | <i>HSD17B4</i> | c.1842G>A at splice       | p.(?)                               | chr5:118862914                 |

| Family       | City      | Consang | Single / multi HL | Aff in family | Inherit | Onset pre-lingual | Synd | Hearing loss                   | New / known allele | Geno type | Gene            | cDNA                           | Protein                           | hg19 position                  |
|--------------|-----------|---------|-------------------|---------------|---------|-------------------|------|--------------------------------|--------------------|-----------|-----------------|--------------------------------|-----------------------------------|--------------------------------|
| AS-BB II     | Jenin     | yes     | multi             | 4             | AR      | pre               |      | severe to profound             | new                | homoz     | <i>ILDR1</i>    | c.820C>T                       | p.(Gln274*)                       | chr3:121712776                 |
| GA-O         | Jenin     | yes     | multi             | 3             | AR      | pre               |      | severe to profound             | new                | homoz     | <i>ILDR1</i>    | c.C820T                        | p.(Gln274*)                       | chr3:121712776                 |
| BB           | Gaza      | yes     | multi             | 2             | AR      | pre               |      | profound                       | new                | homoz     | <i>ILDR1</i>    | c.294delA                      | p.(Val99Phefs*3)                  | chr3:121724176                 |
| GA-A         | Bethlehem | yes     | multi             | 3             | AR      | pre               |      | severe                         | new                | homoz     | <i>LARS2</i>    | c.457A>C                       | p.(Asn153His)                     | chr3:45461162                  |
| HS           | Gaza      | yes     | multi             | 2             | AR      | pre               |      | profound                       | new                | homoz     | <i>LARS2</i>    | c.457A>C                       | p.(Asn153His)                     | chr3:45461162                  |
| Q-F          | Tulkarm   | yes     | multi             | 2             | AR      | pre               | yes  | severe to profound             | new                | homoz     | <i>LARS2</i>    | c.457A>C                       | p.(Asn153His)                     | chr3:45461162                  |
| DD           | Bethlehem | yes     | multi             | 5             | AR      | pre               |      | severe to profound             | known              | homoz     | <i>LHFPL5</i>   | c.1A>G                         | p.(Met1Val)                       | chr6:35773448                  |
| CK           | Salfeet   | yes     | multi             | 1             | AR      | pre               |      | severe to profound             | new                | homoz     | <i>LHFPL5</i>   | c.676+1G>A                     | p.(?)                             | chr6:35787241                  |
| AH           | Bethlehem | yes     | multi             | 6             | AR      | pre               |      | profound                       | new                | homoz     | <i>LOXHD1</i>   | del ex 22-25 out of frame      | p.(?)                             | chr18:44118336_44136525        |
| QS044-047    | Qalqilia  | no      | multi             | 2             | AR      | pre               |      | profound                       | new                | cpd het   | <i>LOXHD1</i>   | c.[(3404_3407dup);(c.4843G>C)] | p.[(Arg1137Valfs*9);(Gly1615Arg)] | chr18:44126967; chr18:44104462 |
| GA-R         | Gaza      | yes     | multi             | 3             | AR      | pre               |      | profound                       | new                | homoz     | <i>LRTOMT</i>   | c.327C>T                       | p.(Cys109Cys)                     | chr11:71817225                 |
| X39          | Jersualem | yes     | sing              | 1             | AR      | pre               |      |                                | new                | homoz     | <i>MARVELD2</i> | c.608dupT                      | p.(Leu203Phefs*18)                | chr5:68715820                  |
| BA           | Hebron    | yes     | multi             | 7             | AR      | pre               |      | profound                       | new                | cpd het   | <i>MYO15A</i>   | c.[(1223C>T);(4240G>A)]        | p.[(Ala408Val);(Glu1414Lys)]      | chr17:18023337; chr17:18035800 |
| C            | Hebron    | yes     | multi             | 11            | AR      | pre               |      | severe to profound             | new                | homoz     | <i>MYO15A</i>   | c.3609+985G>A                  | p.(?)                             | chr17:18026708                 |
| FG           | Hebron    | yes     | multi             | 4             | AR      | pre               |      | severe to profound             | new                | homoz     | <i>MYO15A</i>   | c.3609+985G>A                  | p.(?)                             | chr17:18026708                 |
| GJ           | Hebron    | yes     | multi             | 8             | AR      | pre               |      | severe                         | new                | homoz     | <i>MYO15A</i>   | c.3609+985G>A                  | p.(?)                             | chr17:18026708                 |
| GL           | Hebron    | yes     | multi             | 4             | AR      | pre               |      | severe to profound             | new                | homoz     | <i>MYO15A</i>   | c.3609+985G>A                  | p.(?)                             | chr17:18026708                 |
| HG           | Hebron    | yes     | multi             | 2             | AR      | pre               |      | moderate mixed                 | new                | homoz     | <i>MYO15A</i>   | c.3609+985G>A                  | p.(?)                             | chr17:18026708                 |
| IG           | Hebron    | yes     | multi             | 2             | AR      | pre               |      | moderate                       | new                | cpd het   | <i>MYO15A</i>   | c.[(3609+985G>A);(7207G>T)]    | p.(?);(Asp2403Tyr)                | chr17:18026708; chr17:18052889 |
| E            | Hebron    | no      | multi             | 5             | AR      | pre               |      | moderate to severe             | new                | cpd het   | <i>MYO15A</i>   | c.[(3609+985G>A);(9572G>A)]    | p.(?);(Arg3191His)                | chr17:18026708; chr17:18065953 |
| AR           | Hebron    | no      | sing              | 1             | AR      | pre               |      |                                | new                | cpd het   | <i>MYO15A</i>   | c.[(3609+985G>A);(9572G>A)]    | p.(?);(Arg3191His)                | chr17:18026708; chr17:18065953 |
| EP28         | Bethlehem | yes     | sing              | 1             | AR      | pre               |      | severe to profound             | new                | homoz     | <i>MYO15A</i>   | c.3866+1G>A                    | p.(?)                             | chr17:18029771                 |
| IO           | Salfeet   | yes     | multi             | 2             | AR      | pre               |      | severe to profound             | new                | homoz     | <i>MYO15A</i>   | c.4142+5G>A                    | p.(?)                             | chr17:18034661                 |
| QS027        | Qalqilia  | yes     | multi             | 3             | AR      | pre               |      |                                | new                | homoz     | <i>MYO15A</i>   | c.4142+5G>A                    | p.(?)                             | chr17:18034661                 |
| CI           | Hebron    | yes     | sing              | 1             | AR      | pre               |      | severe to profound             | new                | homoz     | <i>MYO15A</i>   | c.4240G>A                      | p.(Glu1414Lys)                    | chr17:18035800                 |
| DC (α15-α25) | Hebron    | yes     | multi             | 3             | AR      | pre               |      | profound                       | new                | homoz     | <i>MYO15A</i>   | c.4240G>A                      | p.(Glu1414Lys)                    | chr17:18035800                 |
| X3           | Jersualem | yes     | sing              | 1             | AR      | pre               |      |                                | known              | homoz     | <i>MYO15A</i>   | c.6340G>A                      | p.(Val2114Met)                    | chr17:18049252                 |
| X24          | Jersualem | no      | sing              | 1             | AR      | pre               |      |                                | new                | cpd het   | <i>MYO15A</i>   | c.[(6499T>C);(8767C>T)]        | p.[(Tyr2167His);(Arg2923*)]       | chr17:18049411; chr17:18060523 |
| IE           | Hebron    | yes     | multi             | 4             | AR      | pre               |      | HL and cleft palate (IE3 only) | known              | homoz     | <i>MYO15A</i>   | c.6893G>A                      | p.(Arg2298Gln)                    | chr17:18052203                 |
| AL           | Hebron    | yes     | multi             | 3             | AR      | pre               |      | severe to profound             | new                | homoz     | <i>MYO15A</i>   | c.7207G>T                      | p.(Asp2403Tyr)                    | chr17:18052889                 |
| AN           | Hebron    | yes     | multi             | 4             | AR      | pre               |      | severe to profound             | new                | homoz     | <i>MYO15A</i>   | c.7207G>T                      | p.(Asp2403Tyr)                    | chr17:18052889                 |
| BW           | Hebron    | yes     | multi             | 5             | AR      | pre               |      | moderate to severe             | new                | homoz     | <i>MYO15A</i>   | c.7207G>T                      | p.(Asp2403Tyr)                    | chr17:18052889                 |
| CF           | Hebron    | yes     | multi             | 2             | AR      | pre               |      | severe to profound             | new                | homoz     | <i>MYO15A</i>   | c.7207G>T                      | p.(Asp2403Tyr)                    | chr17:18052889                 |
| DX           | Bethlehem | yes     | multi             | 3             | AR      | pre               |      | severe                         | new                | homoz     | <i>MYO15A</i>   | c.7207G>T                      | p.(Asp2403Tyr)                    | chr17:18052889                 |
| HH           | Hebron    | yes     | sing              | 1             | AR      | pre               |      | severe to profound             | new                | homoz     | <i>MYO15A</i>   | c.7207G>T                      | p.(Asp2403Tyr)                    | chr17:18052889                 |
| HI           | Bethlehem | yes     | multi             | 2             | AR      | pre               |      | severe to profound             | new                | homoz     | <i>MYO15A</i>   | c.7207G>T                      | p.(Asp2403Tyr)                    | chr17:18052889                 |
| M            | Hebron    | yes     | multi             | 2             | AR      | pre               |      | profound                       | new                | homoz     | <i>MYO15A</i>   | c.7207G>T                      | p.(Asp2403Tyr)                    | chr17:18052889                 |
| P            | Hebron    | yes     | multi             | 9             | AR      | pre               |      |                                | new                | homoz     | <i>MYO15A</i>   | c.7207G>T                      | p.(Asp2403Tyr)                    | chr17:18052889                 |
| α18          | Hebron    | yes     | sing              | 1             | AR      | pre               |      | severe to profound             | new                | homoz     | <i>MYO15A</i>   | c.7207G>T                      | p.(Asp2403Tyr)                    | chr17:18052889                 |
| α19-α20      | Hebron    | yes     | multi             | 2             | AR      | pre               |      | severe to profound             | new                | homoz     | <i>MYO15A</i>   | c.7207G>T                      | p.(Asp2403Tyr)                    | chr17:18052889                 |
| α8-α9        | Hebron    | yes     | multi             | 3             | AR      | pre               |      | severe to profound             | new                | homoz     | <i>MYO15A</i>   | c.7207G>T                      | p.(Asp2403Tyr)                    | chr17:18052889                 |
| GP           | Hebron    | no      | sing              | 1             | AR      | pre               |      |                                | new                | cpd het   | <i>MYO15A</i>   | c.[(7207G>T);(8183G>A)]        | p.[(Asp2403Tyr);(Arg2728His)]     | chr17:18052889; chr17:18058028 |
| FY           | Hebron    | yes     | multi             | 2             | AR      | pre               |      |                                | known              | homoz     | <i>MYO15A</i>   | c.8183G>A                      | p.(Arg2728His)                    | chr17:18058028                 |
| HJ           | Hebron    | yes     | sing              | 1             | AR      | pre               |      | severe to profound             | known              | homoz     | <i>MYO15A</i>   | c.8183G>A                      | p.(Arg2728His)                    | chr17:18058028                 |
| Z            | Hebron    | yes     | multi             | 3             | AR      | pre               |      |                                | known              | homoz     | <i>MYO15A</i>   | c.8183G>A                      | p.(Arg2728His)                    | chr17:18058028                 |
| BZ           | Bethlehem | yes     | multi             | 8             | AR      | pre               |      | severe to profound             | new                | homoz     | <i>MYO15A</i>   | c.8309_8311del                 | p.(Glu2770del)                    | chr17:18058506                 |
| JQ           | Tubas     | yes     | sing              | 1             | AR      | pre               |      | severe to profound             | new                | homoz     | <i>MYO15A</i>   | c.8788+5G>T                    | p.(?)                             | chr17:18060549                 |
| AI           | Ramallah  | yes     | multi             | 3             | AR      | pre               |      | moderate to severe             | new                | homoz     | <i>MYO15A</i>   | c.9572G>A                      | p.(Arg3191His)                    | chr17:18065953                 |
| CQ           | Ramallah  | yes     | multi             | 2             | AR      | pre               |      | severe to profound             | new                | cpd het   | <i>MYO15A</i>   | c.[(9572G>A);(8309_8311del)]   | p.[(Arg3191His);(Glu2770del)]     | chr17:18065953; chr17:18058506 |
| A132         | Jersualem | yes     | sing              | 1             | AR      | pre               |      |                                | check              | homoz     | <i>MYO3A</i>    | c.1370_1371del                 | p.(Arg457Asnfs*25)                | chr10:26377142                 |
| AV           | Nablus    | yes     | multi             | 6             | AR      | post              |      | profound                       | known              | homoz     | <i>MYO6</i>     | c.897G>T                       | p.(Glu299Asp)                     | chr6:76554694                  |
| X36          | Jersualem | yes     | sing              | 1             | AR      | pre               |      |                                | known              | homoz     | <i>MYO6</i>     | c.897G>T                       | p.(Glu299Asp)                     | chr6:76554694                  |
| AS-V         | Jenin     | yes     | sing              | 1             | AR      | pre               |      |                                | known              | homoz     | <i>MYO6</i>     | c.2777T>A                      | p.(Leu926Gln)                     | chr6:76599892                  |
| AS-W         | Jenin     | yes     | multi             | 5             | AR      | pre               |      |                                | known              | homoz     | <i>MYO6</i>     | c.2777T>A                      | p.(Leu926Gln)                     | chr6:76599892                  |
| QS009        | Qalqilia  | yes     | multi             | 3             | AR      | pre               |      | profound                       | known              | homoz     | <i>MYO6</i>     | c.2777T>A                      | p.(Leu926Gln)                     | chr6:76599892                  |
| AS-R         | Jenin     | yes     | sing              | 1             | AR      | pre               |      |                                | new                | homoz     | <i>MYO7A</i>    | c.4951G>A                      | p.(Gly1651Ser)                    | chr11:72912591                 |
| X5           | Jersualem | yes     | sing              | 1             | AR      | pre               |      |                                | known              | homoz     | <i>MYO7A</i>    | c.700C>T                       | p.(Gln234*)                       | chr11:76868015                 |
| QS017        | Qalqilia  | yes     | multi             | 8             | AR      | pre               |      | severe to profound             | known              | homoz     | <i>MYO7A</i>    | c.1117C>T                      | p.(Arg373Cys)                     | chr11:76871245                 |
| JH           | Salfeet   | no      | multi             | 3             | AR      | pre               | yes  | moderate to severe, w/ Usher   | known              | cpd het   | <i>MYO7A</i>    | c.[(1583T>G);(6229dup)]        | p.[(Leu528Pro);(Trp2077Leufs*51)] | chr11:76873927; chr11:76922374 |
| X40          | Jersualem | yes     | sing              | 1             | AR      | pre               |      |                                | known              | homoz     | <i>MYO7A</i>    | c.2187+1G>T                    | p.(?)                             | chr11:76886511                 |
| GU           | Jenin     | yes     | multi             | 2             | AR      | pre               | yes  | severe to profound, balance    | known              | homoz     | <i>MYO7A</i>    | c.2307del                      | p.(Asn769Lysfs*5)                 | chr11:76890115                 |
| AA-A         | Jenin     | yes     | multi             | 3             | AR      | pre               |      | severe to profound             | new                | homoz     | <i>MYO7A</i>    | c.2683C>T                      | p.(Arg895Cys)                     | chr11:76891516                 |
| X19          | Jersualem | yes     | sing              | 1             | AR      | pre               |      |                                | known              | homoz     | <i>MYO7A</i>    | c.3892G>A                      | p.(Gly1298Arg)                    | chr11:76901883                 |
| QS004        | Qalqilia  | yes     | multi             | 3             | AR      | pre               |      | profound                       | known              | homoz     | <i>MYO7A</i>    | c.4153-2A>G                    | p.(?)                             | chr11:76905397                 |
| QS013        | Qalqilia  | yes     | multi             | 2             | AR      | pre               |      | profound                       | known              | homoz     | <i>MYO7A</i>    | c.4153-2A>G                    | p.(?)                             | chr11:76905397                 |



| Family    | City      | Consang | Single / multi HL | Aff in family | Inherit | Onset pre-lingual | Synd | Hearing loss                  | New / known allele | Geno type | Gene           | cDNA                          | Protein                  | hg19 position                     |
|-----------|-----------|---------|-------------------|---------------|---------|-------------------|------|-------------------------------|--------------------|-----------|----------------|-------------------------------|--------------------------|-----------------------------------|
| QS042-043 | Qalqilia  | yes     | sing              | 1             | AR      | pre               |      |                               | known              | homoz     | <i>MYO7A</i>   | c.4153-2A>G                   | p.(?)                    | chr11:76905397                    |
| AP        | Hebron    | yes     | sing              | 1             | AR      | pre               |      | severe to profound            | new                | homoz     | <i>MYO7A</i>   | c.4297C>T                     | p.(Gln1433*)             | chr11:76905543                    |
| IT        | Jersualem | no      | multi             | 6             | AR      | pre               |      | profound                      | known              | cpd het   | <i>MYO7A</i>   | c.[(5095C>T):(700C>T)]        | p.((Gln1699*):(Gln234*)) | chr11:76913396; chr11:76868015    |
| Q-Q       | Tulkarm   | yes     | sing              | 1             | AR      | pre               |      |                               | known              | homoz     | <i>MYO7A</i>   | c.5101C>T                     | p.(Arg1701*)             | chr11:76913402                    |
| AO        | Hebron    | yes     | multi             | 5             | AR      | pre               |      | severe to profound            | known              | homoz     | <i>MYO7A</i>   | c.6196C>T                     | p.(Gln2066*)             | chr11:76922341                    |
| BV6       | Jersualem | yes     | multi             | 3             | AR      | pre               |      | profound                      | known              | homoz     | <i>MYO7A</i>   | c.6196C>T                     | p.(Gln2066*)             | chr11:76922341                    |
| DT        | Hebron    | yes     | multi             | 2             | AR      | pre               |      |                               | known              | homoz     | <i>MYO7A</i>   | c.6196C>T                     | p.(Gln2066*)             | chr11:76922341                    |
| GB        | Hebron    | yes     | multi             | 3             | AR      | pre               |      |                               | known              | homoz     | <i>MYO7A</i>   | c.6196C>T                     | p.(Gln2066*)             | chr11:76922341                    |
| α12       | Hebron    | yes     | multi             | 3             | AR      | pre               |      |                               | known              | homoz     | <i>MYO7A</i>   | c.6196C>T                     | p.(Gln2066*)             | chr11:76922341                    |
| DI        | Nablus    | yes     | sing              | 1             | AR      | pre               |      | severe to profound            | known              | homoz     | <i>MYO7A</i>   | c.6211C>T                     | p.(Gln2071*)             | chr11:76922356                    |
| HY        | Ramallah  | yes     | sing              | 1             | AR      | pre               |      | severe to profound            | known              | homoz     | <i>MYO7A</i>   | c.6211C>T                     | p.(Gln2071*)             | chr11:76922356                    |
| QS025-026 | Qalqilia  | yes     | sing              | 1             | AR      | pre               |      | profound                      | known              | homoz     | <i>MYO7A</i>   | c.6211C>T                     | p.(Gln2071*)             | chr11:76922356                    |
| A118-119  | Jersualem | yes     | sing              | 1             | AR      | pre               |      | severe to profound            | known              | homoz     | <i>MYO7A</i>   | c.6487G>A                     | p.(Gly2163Ser)           | chr11:76924953                    |
| FD        | Ramallah  | yes     | sing              | 1             | AR      | pre               |      | moderate                      | known              | homoz     | <i>MYO7A</i>   | c.6487G>A                     | p.(Gly2163Ser)           | chr11:76924953                    |
| J9-17     | Hebron    | yes     | multi             | 7             | AR      | pre               |      | severe to profound            | known              | homoz     | <i>MYO7A</i>   | c.6487G>A                     | p.(Gly2163Ser)           | chr11:76924953                    |
| QS014-015 | Qalqilia  | yes     | multi             | 2             | AR      | pre               |      |                               | known              | homoz     | <i>MYO7A</i>   | c.6487G>A                     | p.(Gly2163Ser)           | chr11:76924953                    |
| QS023-024 | Qalqilia  | yes     | sing              | 1             | AR      | pre               |      |                               | known              | homoz     | <i>MYO7A</i>   | c.6487G>A                     | p.(Gly2163Ser)           | chr11:76924953                    |
| X31       | Jersualem | yes     | sing              | 1             | AR      | pre               |      | severe to profound            | known              | homoz     | <i>MYO7A</i>   | c.6487G>A                     | p.(Gly2163Ser)           | chr11:76924953                    |
| DO        | Hebron    | yes     | multi             | 5             | AR      | pre               |      | severe to profound            | new                | homoz     | <i>OTOA</i>    | del 320-550 kb, complete gene |                          | chr16:21675289_21772050 or larger |
| GQ        | Hebron    | yes     | multi             | 7             | AR      | pre               |      | moderate                      | new                | homoz     | <i>OTOA</i>    | del 162-373 kb, complete gene |                          | chr16:21675289_21772050 or larger |
| X10       | Jersualem | yes     | multi             | 2             | AR      | pre               |      |                               | known              | homoz     | <i>OTOA</i>    | del >86kb, complete gene      |                          | chr16:21687467_21773938 or larger |
| X30       | Jersualem | yes     | multi             | 2             | AR      | pre               |      |                               | known              | homoz     | <i>OTOA</i>    | del >86kb, complete gene      |                          | chr16:21687467_21773938 or larger |
| BR        | Bethlehem | yes     | multi             | 7             | AR      | pre               |      | severe to profound            | new                | homoz     | <i>OTOA</i>    | c.1025A>T                     | p.(Asp342Val)            | chr16:21716534                    |
| HT        | Hebron    | yes     | sing              | 1             | AR      | pre               |      | moderate to severe            | new                | homoz     | <i>OTOA</i>    | c.1025A>T                     | p.(Asp342Val)            | chr16:21716534                    |
| X1        | Hebron    | yes     | sing              | 1             | AR      | pre               |      |                               | new                | homoz     | <i>OTOA</i>    | c.2017-2A>G                   | p.(?)                    | chr16:21739560                    |
| X8-9      | Jersualem | yes     | multi             | 2             | AR      | pre               |      |                               | new                | homoz     | <i>OTOA</i>    | c.2017-2A>G                   | p.(?)                    | chr16:21739560                    |
| AM        | Bethlehem | yes     | multi             | 3             | AR      | pre               |      | severe to profound            | known              | homoz     | <i>OTOF</i>    | c.4030C>T                     | p.(Arg1344*)             | chr2:26691336                     |
| IM        | Jersualem | yes     | multi             | 2             | AR      | pre               |      | profound                      | known              | homoz     | <i>OTOF</i>    | c.2239G>T                     | p.(Glu747*)              | chr2:26700593                     |
| FH        | Hebron    | yes     | multi             | 3             | AR      | pre               |      | profound                      | new                | homoz     | <i>OTOF</i>    | c.1477C>T                     | p.(Arg1583Cys)           | chr2:26688592                     |
| DL        | Bethlehem | yes     | multi             | 2             | AD      | pre               | yes  | Waardenberg syn type I        | known              | het       | <i>PAX3</i>    | c.812G>A                      | p.(Arg271His)            | chr2:223086087                    |
| BK        | Jersualem | yes     | multi             | 2             | AD      | pre               | yes  | Waardenburg syn type I        | known              | het       | <i>PAX3</i>    | c.251C>T                      | p.(Ser84Phe)             | chr2:223161767                    |
| DH        | Hebron    | yes     | multi             | 14            | AD      | pre               | yes  | Waardenburg syn type I        | known              | het       | <i>PAX3</i>    | c.251C>T                      | p.(Ser84Phe)             | chr2:223161767                    |
| EP26      | Bethlehem | no      | multi             | 2             | AD      | pre               | yes  | Waardenburg syn type I        | known              | het       | <i>PAX3</i>    | c.251C>T                      | p.(Ser84Phe)             | chr2:223161767                    |
| EP41      | Bethlehem | no      | sing              | 1             | AD      | pre               | yes  | Waardenburg syn type I        | known              | het       | <i>PAX3</i>    | c.218C>T                      | p.(Ser84Phe)             | chr2:223161800                    |
| JM        | Hebron    | yes     | sing              | 2             | AD      | pre               | yes  | Waardenburg syn type I        | new                | het       | <i>PAX3</i>    | c.202C>T                      | p.(Arg68Trp)             | chr2:223161816                    |
| A161      | Jersualem | yes     | sing              | 1             | AR      | pre               |      | moderate                      | new                | homoz     | <i>PCDH15</i>  | c.4726C>T                     | p.(Gln1576*)             | chr10:55569099                    |
| AS-T      | Jenin     | yes     | multi             | 3             | AR      | pre               |      |                               | new                | homoz     | <i>PCDH15</i>  | c.4726C>T                     | p.(Gln1576*)             | chr10:55569099                    |
| CA        | Salfet    | yes     | sing              | 1             | AR      | pre               |      | severe to profound            | new                | homoz     | <i>PCDH15</i>  | c.4726C>T                     | p.(Gln1576*)             | chr10:55569099                    |
| EX        | Qalqilia  | yes     | multi             | 3             | AR      | pre               |      | severe to profound            | new                | homoz     | <i>PCDH15</i>  | c.4726C>T                     | p.(Gln1576*)             | chr10:55569099                    |
| GY        | Salfet    | yes     | multi             | 3             | AR      | pre               |      | severe to profound            | new                | homoz     | <i>PCDH15</i>  | c.4726C>T                     | p.(Gln1576*)             | chr10:55569099                    |
| X21       | Jersualem | yes     | sing              | 1             | AR      | pre               |      |                               | new                | homoz     | <i>PCDH15</i>  | c.4726C>T                     | p.(Gln1576*)             | chr10:55569099                    |
| GA-U      | Gaza      | yes     | multi             | 2             | AR      | pre               |      |                               | new                | homoz     | <i>PCDH15</i>  | c.432C>G                      | p.(Asp144Glu)            | chr10:56128937                    |
| A         | Hebron    | yes     | multi             | 12            | AR      | pre               |      | severe to profound            | known              | homoz     | <i>PJVK</i>    | c.406C>T                      | p.(Arg136*)              | chr2:179319253                    |
| B1-2      | Hebron    | yes     | sing              | 1             | AR      | pre               |      | severe to profound            | known              | homoz     | <i>PJVK</i>    | c.406C>T                      | p.(Arg136*)              | chr2:179319253                    |
| GW        | Nablus    | yes     | multi             | 6             | XR      | pre               |      | severe to profound            | known              | hemiz     | <i>POU3F4</i>  | c.G845T                       | p.(Arg282Leu)            | chrX:82764177                     |
| JE        | Tubas     | no      | multi             | 5             | XR      | pre               |      | moderate                      | known              | hemiz     | <i>POU3F4</i>  | c.G845T                       | p.(Arg282Leu)            | chrX:82764177                     |
| GA-G      | Gaza      | yes     | sing              | 1             | AR      | pre               |      | severe to profound            | known              | homoz     | <i>POU4F3</i>  | c.54delA                      | p.(Glu18Aspfs*66)        | chr5:145718729                    |
| X32       | Jersualem | yes     | sing              | 1             | AR      | pre               |      |                               | new                | homoz     | <i>POU4F3</i>  | c.694G>T                      | p.(Glu232*)              | chr5:145719684                    |
| CN        | Bethlehem | yes     | multi             | 3             | AR      | pre               |      | moderate                      | known              | homoz     | <i>PTPRQ</i>   | c.769G>T                      | p.(Glu257*)              | chr12:80878248                    |
| DP        | Bethlehem | yes     | multi             | 3             | AR      | pre               |      | moderate, vestibular problems | known              | homoz     | <i>PTPRQ</i>   | c.769G>T                      | p.(Glu257*)              | chr12:80878248                    |
| AS-EE     | Jenin     | yes     | multi             | 3             | AR      | pre               |      | severe to profound            | new                | homoz     | <i>PTPRQ</i>   | c.6730C>T                     | p.(Gln2244*)             | chr12:81067075                    |
| EC        | Hebron    | yes     | multi             | 2             | AR      | pre               | yes  | severe w/mild MR, DD          | known              | homoz     | <i>PTRH2</i>   | c.254A>C                      | p.(Gln85Pro)             | chr17:57775086                    |
| FF        | Hebron    | yes     | multi             | 2             | AR      | pre               | yes  | severe w/mild MR, DD          | known              | homoz     | <i>PTRH2</i>   | c.254A>C                      | p.(Gln85Pro)             | chr17:57775086                    |
| IH        | Hebron    | yes     | sing              | 1             | AR      | pre               |      |                               | new                | homoz     | <i>RDX</i>     | c.513_514delAA                | p.(Arg171Serfs*6)        | chr11:110128868                   |
| AS-P      | Jenin     | yes     | sing              | 1             | AR      | pre               |      | severe to profound            | new                | homoz     | <i>SLC26A4</i> | c.284G>A                      | p.(Gly95Glu)             | chr7:107303860                    |
| GA-Q      | Gaza      | yes     | multi             | 2             | AR      | pre               |      | severe to profound            | new                | homoz     | <i>SLC26A4</i> | c.304G>A                      | p.(Gly102Arg)            | chr7:107303880                    |
| JF1       | Ramallah  | yes     | multi             | 4             | AR      | pre               |      | moderate to severe            | new                | homoz     | <i>SLC26A4</i> | c.304G>A                      | p.(Gly102Arg)            | chr7:107303880                    |
| EZ        | Nablus    | yes     | multi             | 3             | AR      | pre               |      | severe to profound            | known              | homoz     | <i>SLC26A4</i> | c.397T>A                      | p.(Ser133Thr)            | chr7:107312675                    |
| Y         | Hebron    | yes     | multi             | 10            | AR      | pre               |      |                               | known              | homoz     | <i>SLC26A4</i> | c.716T>A                      | p.(Val239Asp)            | chr7:107315505                    |
| AA-L      | Jenin     | yes     | multi             | 4             | AR      | pre               |      | severe to profound            | known              | homoz     | <i>SLC26A4</i> | c.1001G>T                     | p.(Gly334Val)            | chr7:107323982                    |
| BF        | Bethlehem | yes     | multi             | 3             | AR      | pre               |      | severe to profound            | known              | homoz     | <i>SLC26A4</i> | c.1001G>T                     | p.(Gly334Val)            | chr7:107323982                    |
| C5/C8     | Hebron    | yes     | multi             | 2             | AR      | pre               |      | severe to profound            | known              | homoz     | <i>SLC26A4</i> | c.1001G>T                     | p.(Gly334Val)            | chr7:107323982                    |
| DY        | Hebron    | yes     | sing              | 1             | AR      | pre               |      | severe to profound            | known              | homoz     | <i>SLC26A4</i> | c.1001G>T                     | p.(Gly334Val)            | chr7:107323982                    |
| EP13-14   | Bethlehem | yes     | multi             | 2             | AR      | pre               |      | severe to profound            | known              | homoz     | <i>SLC26A4</i> | c.1001G>T                     | p.(Gly334Val)            | chr7:107323982                    |
| EP35      | Bethlehem | yes     | sing              | 1             | AR      | pre               |      | severe to profound            | known              | homoz     | <i>SLC26A4</i> | c.1001G>T                     | p.(Gly334Val)            | chr7:107323982                    |
| HQ        | Gaza      | yes     | multi             | 3             | AR      | pre               |      | severe to profound            | known              | homoz     | <i>SLC26A4</i> | c.1001G>T                     | p.(Gly334Val)            | chr7:107323982                    |

| Family         | City       | Consang | Single / multi HL | Aff in family | Inherit | Onset pre-lingual | Synd | Hearing loss             | New / known allele | Geno type | Gene           | cDNA                           | Protein                          | hg19 position                     |
|----------------|------------|---------|-------------------|---------------|---------|-------------------|------|--------------------------|--------------------|-----------|----------------|--------------------------------|----------------------------------|-----------------------------------|
| JF2            | Ramallah   | yes     | sing              | 1             | AR      | pre               |      | moderate to severe       | known              | homoz     | <i>SLC26A4</i> | c.1001G>T                      | p.(Gly334Val)                    | chr7:107323982                    |
| X4             | Bethlehem  | yes     | multi             | 5             | AR      | pre               |      | profound                 | known              | homoz     | <i>SLC26A4</i> | c.1001G>T                      | p.(Gly334Val)                    | chr7:107323982                    |
| α22            | Hebron     | yes     | sing              | 1             | AR      | pre               |      |                          | known              | homoz     | <i>SLC26A4</i> | c.1001G>T                      | p.(Gly334Val)                    | chr7:107323982                    |
| EO             | Ramallah   | yes     | sing              | 1             | AR      | pre               |      |                          | new                | cpd het   | <i>SLC26A4</i> | c.[(1054delG);(334C>T)]        | p.((Ala352Hisfs*16);(Pro112Ser)) | chr7:107329550; chr7:107312612    |
| EM             | Hebron     | yes     | multi             | 4             | AR      | pre               |      | severe to profound       | known              | homoz     | <i>SLC26A4</i> | c.1061T>C                      | p.(Phe354Ser)                    | chr7:107329557                    |
| CS             | Jenin      | yes     | multi             | 6             | AR      | pre               |      | severe                   | known              | homoz     | <i>SLC26A4</i> | c.1198delT                     | p.(Cys400Valfs*32)               | chr7:107330617                    |
| FB             | Hebron     | yes     | multi             | 3             | AR      | pre               | yes  | moderate w/Pendred syn   | known              | homoz     | <i>SLC26A4</i> | c.1198delT                     | p.(Cys400Valfs*32)               | chr7:107330617                    |
| J6-8           | Hebron     | yes     | multi             | 2             | AR      | pre               |      |                          | known              | homoz     | <i>SLC26A4</i> | c.1198delT                     | p.(Cys400Valfs*32)               | chr7:107330617                    |
| GR             | Nablus     | no      | multi             | 2             | AR      | pre               |      |                          | known              | cpd het   | <i>SLC26A4</i> | c.[(1198delT);(1001G>T)]       | p.((Cys400Valfs*32);(Gly334Val)) | chr7:107330617; chr7:107323982    |
| CB             | Bethlehem  | yes     | multi             | 4             | AR      | pre               |      | severe to profound       | known              | homoz     | <i>SLC26A4</i> | c.1341+1delG                   | p.(?)                            | chr7:107334926                    |
| FU4            | Hebron     | yes     | sing              | 1             | AR      | pre               |      | severe to profound       | known              | homoz     | <i>SLC26A4</i> | c.1341+1delG                   | p.(?)                            | chr7:107334926                    |
| HB             | Hebron     | yes     | multi             | 3             | AR      | pre               |      | severe to profound       | known              | homoz     | <i>SLC26A4</i> | c.1341+1delG                   | p.(?)                            | chr7:107334926                    |
| X2             | Jersuaalem | yes     | sing              | 1             | AR      | pre               |      |                          | known              | homoz     | <i>SLC26A4</i> | c.1341+1delG                   | p.(?)                            | chr7:107334926                    |
| α21            | Hebron     | yes     | sing              | 1             | AR      | pre               |      |                          | known              | homoz     | <i>SLC26A4</i> | c.1341+1delG                   | p.(?)                            | chr7:107334926                    |
| HF             | Nablus     | no      | multi             | 4             | AR      | pre               | yes  | severe to profound w/EVA | new                | cpd het   | <i>SLC26A4</i> | c.[(1341+1delG);(1149_1149+5)] | p.((?);(?))                      | chr7:107334926; chr7:107329645    |
| Q-B            | Tulkarm    | yes     | multi             | 3             | AR      | pre               |      |                          | known              | homoz     | <i>SLC26A4</i> | c.1489G>A                      | p.(Gly497Ser)                    | chr7:107336429                    |
| QS002          | Qalqilia   | yes     | multi             | 2             | AR      | pre               |      | moderate                 | known              | homoz     | <i>SLC26A4</i> | c.2048T>C                      | p.(Phe683Ser)                    | chr7:107344789                    |
| QS058-059      | Qalqilia   | yes     | multi             | 4             | AR      | pre               |      |                          | known              | homoz     | <i>SLC26A4</i> | c.2048T>C                      | p.(Phe683Ser)                    | chr7:107344789                    |
| GA-T           | Gaza       | yes     | multi             | 4             | AR      | pre               |      |                          | known              | homoz     | <i>STRC</i>    | complete gene deletion         |                                  | chr15:43891761_43910998 or larger |
| CZ9-10 (α6-α7) | Hebron     | yes     | multi             | 2             | AR      | pre               |      | severe to profound       | new                | homoz     | <i>TBC1D24</i> | c.1114_1116del                 | p.(Ser372del)                    | chr16:2548369                     |
| HD             | Hebron     | yes     | multi             | 2             | AR      | pre               |      | moderate to severe       | known              | homoz     | <i>TECTA</i>   | c.1705C>T                      | p.(Gln569*)                      | chr11:120996512                   |
| BI             | Hebron     | yes     | multi             | 5             | AR      | pre               |      | moderate                 | known              | homoz     | <i>TECTA</i>   | c.4857C>A                      | p.(Cys1619*)                     | chr11:121031011                   |
| BQ             | Bethlehem  | yes     | multi             | 5             | AR      | pre               |      | moderate                 | known              | homoz     | <i>TECTA</i>   | c.4857C>A                      | p.(Cys1619*)                     | chr11:121031011                   |
| CH             | Bethlehem  | yes     | multi             | 7             | AR      | pre               |      | moderate to severe       | known              | homoz     | <i>TECTA</i>   | c.4857C>A                      | p.(Cys1619*)                     | chr11:121031011                   |
| CV             | Hebron     | yes     | multi             | 11            | AR      | pre               |      | moderate                 | known              | homoz     | <i>TECTA</i>   | c.4857C>A                      | p.(Cys1619*)                     | chr11:121031011                   |
| EP40           | Bethlehem  | yes     | multi             | 2             | AR      | pre               |      | moderate to severe       | known              | homoz     | <i>TECTA</i>   | c.4857C>A                      | p.(Cys1619*)                     | chr11:121031011                   |
| HM             | Bethlehem  | yes     | multi             | 4             | AR      | pre               |      | moderate to severe       | known              | homoz     | <i>TECTA</i>   | c.4857C>A                      | p.(Cys1619*)                     | chr11:121031011                   |
| HP             | Bethlehem  | yes     | multi             | 7             | AR      | pre               |      | moderate                 | known              | homoz     | <i>TECTA</i>   | c.4857C>A                      | p.(Cys1619*)                     | chr11:121031011                   |
| JA             | Hebron     | no      | multi             | 7             | AD      | pre               |      | moderate to severe       | known              | het       | <i>TECTA</i>   | c.5609A>G                      | p.(Tyr1870Cys)                   | chr11:121038785                   |
| GA-P           | Gaza       | yes     | multi             | 3             | AR      | pre               |      | profound                 | known              | homoz     | <i>TMC1</i>    | c.100C>T                       | p.(Arg34*)                       | chr9:7530944                      |
| FA             | Nablus     | no      | multi             | 2             | AR      | pre               |      | moderate to profound     | known              | cpd het   | <i>TMC1</i>    | c.[(100C>T);(1532C>A)]         | p.(Arg34*);(Pro511His)]          | chr9:7530944; chr9:75407234       |
| GA-F           | Gaza       | yes     | multi             | 3             | AR      | pre               |      | severe to profound       | new                | homoz     | <i>TMC1</i>    | c.1184delA                     | p.(Gln395Argfs*15)               | chr9:75404193                     |
| DN             | Hebron     | yes     | multi             | 2             | AR      | pre               |      | severe to profound       | new                | homoz     | <i>TMC1</i>    | c.1763-1G>T                    | p.(?)                            | chr9:75431127                     |
| AU             | Hebron     | yes     | multi             | 3             | AR      | pre               |      | severe to profound       | known              | homoz     | <i>TMPRSS3</i> | c.1193delA                     | p.(Gln398Argfs*18)               | chr21:43796651                    |
| BG-B           | Hebron     | yes     | multi             | 9             | AR      | pre               |      | severe to profound       | known              | homoz     | <i>TMPRSS3</i> | c.1193delA                     | p.(Gln398Argfs*18)               | chr21:43796651                    |
| BG-G           | Hebron     | yes     | multi             | 7             | AR      | pre               |      | severe to profound       | known              | homoz     | <i>TMPRSS3</i> | c.1193delA                     | p.(Gln398Argfs*18)               | chr21:43796651                    |
| CU             | Hebron     | yes     | multi             | 4             | AR      | pre               |      | severe to profound       | known              | homoz     | <i>TMPRSS3</i> | c.1193delA                     | p.(Gln398Argfs*18)               | chr21:43796651                    |
| EP45           | Bethlehem  | yes     | sing              | 1             | AR      | pre               |      | severe to profound       | known              | homoz     | <i>TMPRSS3</i> | c.1193delA                     | p.(Gln398Argfs*18)               | chr21:43796651                    |
| IX             | Hebron     | yes     | multi             | 4             | AR      | pre               |      | moderate                 | known              | homoz     | <i>TMPRSS3</i> | c.1193delA                     | p.(Gln398Argfs*18)               | chr21:43796651                    |
| JC             | Hebron     | yes     | multi             | 2             | AR      | pre               |      | moderate                 | known              | homoz     | <i>TMPRSS3</i> | c.1193delA                     | p.(Gln398Argfs*18)               | chr21:43796651                    |
| R              | Hebron     | yes     | sing              | 1             | AR      | pre               |      | moderate to severe       | known              | homoz     | <i>TMPRSS3</i> | c.1193delA                     | p.(Gln398Argfs*18)               | chr21:43796651                    |
| W              | Hebron     | yes     | multi             | 15            | AR      | pre               |      | severe to profound       | known              | homoz     | <i>TMPRSS3</i> | c.1193delA                     | p.(Gln398Argfs*18)               | chr21:43796651                    |
| CL             | Ramallah   | yes     | multi             | 4             | AR      | pre               |      | severe to profound       | known              | homoz     | <i>TMPRSS3</i> | c.1176del8ins-1224             | p.(?)                            | chr21:43796665                    |
| EP36           | Bethlehem  | yes     | sing              | 1             | AR      | pre               |      |                          | known              | homoz     | <i>TMPRSS3</i> | c.989delA                      | p.(Glu330Glyfs*28)               | chr21:43800285                    |
| GT             | Hebron     | yes     | sing              | 1             | AR      | pre               |      | moderate to severe       | known              | homoz     | <i>TMPRSS3</i> | c.989delA                      | p.(Glu330Glyfs*28)               | chr21:43800285                    |
| JB             | Hebron     | yes     | sing              | 1             | AR      | pre               |      | severe to profound       | known              | homoz     | <i>TMPRSS3</i> | c.989delA                      | p.(Glu330Glyfs*28)               | chr21:43800285                    |
| I              | Hebron     | yes     | multi             | 3             | AR      | pre               |      |                          | known              | homoz     | <i>TMPRSS3</i> | c.582T>A                       | p.(Cys194*)                      | chr21:43804113                    |
| AA-X           | Jenin      | yes     | multi             | 3             | AR      | pre               |      | severe to profound       | known              | homoz     | <i>TMPRSS3</i> | c.323-6G>A                     | p.(?)                            | chr21:43808641                    |
| AE             | Hebron     | yes     | sing              | 1             | AR      | pre               |      | moderate to severe       | known              | homoz     | <i>TRIOBP</i>  | c.1039C>T                      | p.(Arg347*)                      | chr22:38119602                    |
| AK             | Bethlehem  | yes     | multi             | 6             | AR      | pre               |      | moderate to severe       | known              | homoz     | <i>TRIOBP</i>  | c.1039C>T                      | p.(Arg347*)                      | chr22:38119602                    |
| AX             | Bethlehem  | yes     | multi             | 4             | AR      | pre               |      | moderate                 | known              | homoz     | <i>TRIOBP</i>  | c.1039C>T                      | p.(Arg347*)                      | chr22:38119602                    |
| AZ             | Bethlehem  | yes     | multi             | 6             | AR      | pre               |      | moderate                 | known              | homoz     | <i>TRIOBP</i>  | c.1039C>T                      | p.(Arg347*)                      | chr22:38119602                    |
| DU             | Hebron     | yes     | sing              | 1             | AR      | pre               |      | severe                   | known              | homoz     | <i>TRIOBP</i>  | c.1039C>T                      | p.(Arg347*)                      | chr22:38119602                    |
| EP30           | Bethlehem  | yes     | sing              | 1             | AR      | pre               |      | profound                 | known              | homoz     | <i>TRIOBP</i>  | c.1039C>T                      | p.(Arg347*)                      | chr22:38119602                    |
| FV             | Hebron     | yes     | multi             | 2             | AR      | pre               |      | severe                   | known              | homoz     | <i>TRIOBP</i>  | c.1039C>T                      | p.(Arg347*)                      | chr22:38119602                    |
| ID             | Bethlehem  | yes     | multi             | 3             | AR      | pre               |      |                          | known              | homoz     | <i>TRIOBP</i>  | c.1039C>T                      | p.(Arg347*)                      | chr22:38119602                    |
| K              | Bethlehem  | yes     | multi             | 11            | AR      | pre               |      | severe to profound       | known              | homoz     | <i>TRIOBP</i>  | c.1039C>T                      | p.(Arg347*)                      | chr22:38119602                    |
| HA             | Jersuaalem | yes     | multi             | 8             | AR      | pre               |      | severe to profound       | known              | cpd het   | <i>TRIOBP</i>  | c.[(1039C>T);(1741C>T)]        | p.((Arg347*);(Gln581*))          | chr22:38119602; chr22:38120304    |
| X7-X25         | Jersuaalem | yes     | multi             | 2             | AR      | pre               |      | severe to profound       | known              | cpd het   | <i>TRIOBP</i>  | c.[(1039C>T);(1741C>T)]        | p.((Arg347*);(Gln581*))          | chr22:38119602; chr22:38120304    |
| AY             | Bethlehem  | yes     | multi             | 9             | AR      | pre               |      | moderate                 | known              | homoz     | <i>TRIOBP</i>  | c.1741C>T                      | p.(Gln581*)                      | chr22:38120304                    |
| BD             | Bethlehem  | yes     | multi             | 2             | AR      | pre               |      | severe to profound       | known              | homoz     | <i>TRIOBP</i>  | c.1741C>T                      | p.(Gln581*)                      | chr22:38120304                    |
| DR             | Bethlehem  | yes     | multi             | 4             | AR      | pre               |      | profound                 | known              | homoz     | <i>TRIOBP</i>  | c.1741C>T                      | p.(Gln581*)                      | chr22:38120304                    |
| EP44           | Bethlehem  | yes     | sing              | 1             | AR      | pre               |      | moderate to severe       | known              | homoz     | <i>TRIOBP</i>  | c.1741C>T                      | p.(Gln581*)                      | chr22:38120304                    |
| FK             | Hebron     | yes     | sing              | 1             | AR      | pre               |      | severe to profound       | known              | homoz     | <i>TRIOBP</i>  | c.1741C>T                      | p.(Gln581*)                      | chr22:38120304                    |
| GE             | Hebron     | yes     | sing              | 1             | AR      | pre               |      |                          | known              | homoz     | <i>TRIOBP</i>  | c.1741C>T                      | p.(Gln581*)                      | chr22:38120304                    |
| GN             | Hebron     | yes     | multi             | 5             | AR      | pre               |      | severe                   | known              | homoz     | <i>TRIOBP</i>  | c.1741C>T                      | p.(Gln581*)                      | chr22:38120304                    |

| Family | City       | Consang | Single / multi HL | Aff in family | Inherit | Onset pre-lingual | Synd | Hearing loss                   | New / known allele | Geno type | Gene          | cDNA             | Protein             | hg19 position           |
|--------|------------|---------|-------------------|---------------|---------|-------------------|------|--------------------------------|--------------------|-----------|---------------|------------------|---------------------|-------------------------|
| QS033  | Qalqilia   | yes     | multi             | 3             | AR      | pre               |      | severe                         | known              | homoz     | <i>TRIOBP</i> | c.1741C>T        | p.(Gln581*)         | chr22:38120304          |
| CM     | Hebron     | yes     | multi             | 3             | AR      | pre               |      |                                | new                | homoz     | <i>TRIOBP</i> | c.2202_2203delTC | p.(Arg735Glnfs*25)  | chr22:38120765          |
| GM     | Jersuaalem | yes     | multi             | 4             | AR      | pre               |      | severe to profound             | new                | homoz     | <i>TRIOBP</i> | c.3232dup        | p.(Arg1078Profs*6)  | chr22:38121795          |
| DV     | Hebron     | yes     | multi             | 2             | AR      | pre               |      | severe to profound, onset 1.5y | new                | homoz     | <i>USH1C</i>  | c.104+5G>C       | p.(?)               | chr11:17554797          |
| FL     | Jersuaalem | yes     | multi             | 2             | AR      | pre               | yes  | profound w/ Usher syndrome     | new                | homoz     | <i>USH1C</i>  | c.104+5G>C       | p.(?)               | chr11:17554797          |
| BG-R   | Hebron     | yes     | multi             | 3             | AR      | pre               | yes  | profound w/ Usher syndrome     | known              | homoz     | <i>USH1G</i>  | c.832_851del     | p.(Ser278Profs*71)  | chr17:72916080_72916099 |
| α14    | Hebron     | yes     | sing              | 1             | AR      | pre               |      |                                | known              | homoz     | <i>USH1G</i>  | c.469dup         | p.(His157Profs*199) | chr17:72916461          |
| C32    | Hebron     | yes     | multi             | 2             | AR      | pre               |      | moderate, no other signs       | new                | homoz     | <i>USH2A</i>  | c.9685delG       | p.(Glu3229Argfs*72) | chr1:215987132          |
| IR     | Hebron     | yes     | multi             | 3             | AR      | pre               | yes  | moderate to severe w/RP        | new                | homoz     | <i>USH2A</i>  | c.9685delG       | p.(Glu3229Argfs*72) | chr1:215987132          |
| JJ     | Hebron     | yes     | multi             | 4             | AR      | pre               |      | moderate, no other signs       | new                | homoz     | <i>USH2A</i>  | c.9685delG       | p.(Glu3229Argfs*72) | chr1:215987132          |

**Table S3. Hearing loss in consanguineous and non-consanguineous families**

| <b>Hearing loss</b>             | <b>Consanguineous families</b> | <b>Non consanguineous families</b> | <b>Total</b> |
|---------------------------------|--------------------------------|------------------------------------|--------------|
| Autosomal recessive, homozygous | 293                            | 2                                  | 295          |
| AR compound heterozygous        | 11                             | 17                                 | 28           |
| Autosomal dominant              | 6                              | 5                                  | 11           |
| X-linked                        | 2                              | 1                                  | 3            |
| No genetic diagnosis            | 128                            | 26                                 | 154          |
| <b>Total</b>                    | <b>440</b>                     | <b>51</b>                          | <b>491</b>   |

**Table S4. Missense mutations in Palestinian families with hearing loss**

| Gene                                                                                              | Protein        | cDNA       | zygosity | hg19 position  | Hearing loss phenotype                                                | Pal families with mutation | co-seg P | Pal control exomes (2618) | gnomad exomes (246366) | Our suggestion for ClinVar | Evidence for interpretation in addition to co-segregation P-values and control allele frequencies                                                                   |
|---------------------------------------------------------------------------------------------------|----------------|------------|----------|----------------|-----------------------------------------------------------------------|----------------------------|----------|---------------------------|------------------------|----------------------------|---------------------------------------------------------------------------------------------------------------------------------------------------------------------|
| <b>A. Missense mutations not reported elsewhere: private or Palestinian founder mutations</b>     |                |            |          |                |                                                                       |                            |          |                           |                        |                            |                                                                                                                                                                     |
| <i>CACNA1D</i>                                                                                    | p.(Ala376Val)  | c.1127C>T  | homoz    | chr3:53707750  | congenital, moderate w/cardiac signs (prolonged AV conduction on EEG) | 4                          | 2.58E-05 | 0                         | 4                      | LP                         | Good fit to syndromic recessive phenotype; co-seg in multiple families, completely conserved residue, TM domain                                                     |
| <i>CDH23</i>                                                                                      | p.(Asp228Val)  | c.683A>T   | homoz    | chr10:73330605 | congenital, profound                                                  | 1                          | 0.047    | 0                         | 0                      | LP                         | Completely conserved residue                                                                                                                                        |
| <i>CDH23</i>                                                                                      | p.(Asn1521Ser) | c.4562A>G  | homoz    | chr10:73500652 | congenital, profound                                                  | 1                          | 6.50E-03 | 0                         | 5                      | LP                         | Completely conserved residue                                                                                                                                        |
| <i>CDH23</i>                                                                                      | p.(Glu1917Lys) | c.5749G>A  | homoz    | chr10:73545424 | congenital with RP                                                    | 1                          | 0.012    | 0                         | 0                      | LP                         | Completely conserved residue; Usher 1D mutation region                                                                                                              |
| <i>CDH23</i>                                                                                      | p.(Asp2714Tyr) | c.8140G>T  | homoz    | chr10:73566000 | congenital, severe to profound                                        | 1                          | 0.047    | 0                         | 0                      | LP                         | Completely conserved residue                                                                                                                                        |
| <i>CDH23</i>                                                                                      | p.(Leu2735Pro) | c.8204T>C  | homoz    | chr10:73567059 | congenital, severe to profound                                        | 2                          | 1.53E-05 | 0                         | 0                      | LP                         | Completely conserved residue                                                                                                                                        |
| <i>COL11A2</i>                                                                                    | p.(Gly1027Glu) | c.3080G>A  | homoz    | chr6:33139560  | HL and joint problems                                                 | 1                          | 5.00E-04 | 0                         | 0                      | LP                         | Good fit to syndromic phenotype; completely conserved residue                                                                                                       |
| <i>DNAH11</i>                                                                                     | p.(Thr3824Pro) | c.11470A>C | homoz    | chr7:21904249  | severe to profound, recurrent ear infections, conductive?             | 1                          | 0.026    | 0                         | 0                      | LP                         | Good fit to syn phenotype (Primary ciliary dyskinesia); polyphen 0.99, gerp 5.2                                                                                     |
| <i>EDNRB</i>                                                                                      | p.(Val275Met)  | c.823G>A   | homoz    | chr13:78477673 | Waardenburg syn                                                       | 1                          | 0.011    | 0                         | 33                     | LP                         | Good fit to recessive syndromic phenotype; completely conserved residue                                                                                             |
| <i>ESRRB</i>                                                                                      | p.(Arg182His)  | c.545G>A   | homoz    | chr14:76948389 | congenital, severe to profound                                        | 1                          | 6.50E-03 | 1                         | 0                      | LP                         | Co-seg in very large family; gerp 4.9; R179H pathogenic per RJSmith                                                                                                 |
| <i>LHFPLS</i>                                                                                     | p.(Met1Val)    | c.1A>G     | homoz    | chr6:35773448  | congenital, severe to profound                                        | 1                          | 2.44E-04 | 0                         | 28                     | LP                         | Translation start                                                                                                                                                   |
| <i>MYO15A</i>                                                                                     | p.(Ala408Val)  | c.1223C>T  | cpd het  | chr17:18023337 | congenital profound                                                   | 1                          | 0.063    | 9                         | 5                      | VUS                        | Compound het with MYO15A c.4240G>A enhancer mutaton                                                                                                                 |
| <i>MYO6</i>                                                                                       | p.(Leu926Gln)  | c.2777T>A  | homoz    | chr6:76599892  | congenital, profound                                                  | 3                          | 3.83E-06 | 0                         | 0                      | LP                         |                                                                                                                                                                     |
| <i>MYO7A</i>                                                                                      | p.(Arg895Cys)  | c.2683C>T  | homoz    | chr11:76891516 | congenital, severe to profound                                        | 1                          | 6.50E-04 | 0                         | 4                      | LP                         |                                                                                                                                                                     |
| <i>OTOA</i>                                                                                       | p.(Asp342Val)  | c.1025A>T  | homoz    | chr16:21716534 | moderate to profound                                                  | 2                          | 2.50E-08 | 2                         | 0                      | LP                         | Polyphen 1.0, gerp 5.3; very large family                                                                                                                           |
| <i>OTOF</i>                                                                                       | p.(Arg1583Cys) | c.1477C>T  | homoz    | chr2:26688592  | congenital, profound                                                  | 1                          | 0.036    | 0                         | 5                      | LP                         | R1583H pathogenic on ClinVar as cpd het w/nonsense                                                                                                                  |
| <i>PAX3</i>                                                                                       | p.(Arg68Trp)   | c.202C>T   | het      | chr2:223161816 | Waardenburg syn                                                       | 1                          | sing     | 0                         | 0                      | LP                         | Good fit to syn phenotype in proband and mother; completely conserved residue                                                                                       |
| <i>PCDH15</i>                                                                                     | p.(Asp144Glu)  | c.432C>G   | homoz    | chr10:56128937 | congenital, severe to profound                                        | 1                          | 0.047    | 0                         | 0                      | LP                         | Completely conserved residue; cadherin domain; R134G causes HL in Pakistani family                                                                                  |
| <b>B. Missense mutations suggested to be reclassified from VUS or benign to likely pathogenic</b> |                |            |          |                |                                                                       |                            |          |                           |                        |                            |                                                                                                                                                                     |
| <i>CDH23</i>                                                                                      | p.(Pro2205Leu) | c.6614C>T  | homoz    | chr10:73553299 | congenital, moderate to severe                                        | 2                          | 0.063    | 0                         | 0                      | LP                         | Arab allele; VUS by Expert Panel due to few Arab popn controls; suggest reclassification given 2 more Pal allele, now with convincing family data and popn controls |
| <i>CLDN14</i>                                                                                     | p.(Pro28Leu)   | c.83C>T    | homoz    | chr21:37833911 | congenital, severe to profound                                        | 7                          | 2.50E-10 | 0                         | 3                      | LP                         |                                                                                                                                                                     |
| <i>GIPC3</i>                                                                                      | p.(Thr41Lys)   | c.122C>A   | homoz    | chr19:3585717  | severe to profound w/ epilepsy                                        | 1                          | 0.02     | 0                         | 2                      | LP                         | Additional family to add to observation in Saudi family (PMID:23510777)                                                                                             |
| <i>MYO7A</i>                                                                                      | p.(Arg373Cys)  | c.1117C>T  | homoz    | chr11:76871245 | congenital, severe to profound                                        | 1                          | 1.72E-05 | 0                         | 0                      | LP                         | Completely conserved site, now another, very large family, still 0 in controls                                                                                      |
| <i>POU3F4</i>                                                                                     | p.(Arg282Leu)  | c.845G>T   | hemiz    | chrX:82764177  | congenital, moderate to severe                                        | 2                          | 0.001    | 0                         | 0                      | LP                         | Two additional families, absent in popn controls                                                                                                                    |
| <i>SLC26A4</i>                                                                                    | p.(Phe354Ser)  | c.1061T>C  | homoz    | chr7:107329557 | congenital, severe to profound                                        | 3                          | 6.50E-03 | 5                         | 184                    | LP                         | Common but all gnomad and popn controls are hets; suggest reclassification based on 3 additional families; mutation predicted to weaken TM domain                   |

| Gene                                                                                                      | Protein        | cDNA      | zygosity | hg19 position   | Hearing loss phenotype                                        | Pal families with mutation | co-seg P | Pal control exomes (2618) | gnomad exomes (246366) | Our suggestion for ClinVar | Evidence for interpretation in addition to co-segregation P-values and control allele frequencies |
|-----------------------------------------------------------------------------------------------------------|----------------|-----------|----------|-----------------|---------------------------------------------------------------|----------------------------|----------|---------------------------|------------------------|----------------------------|---------------------------------------------------------------------------------------------------|
| <b>C. Missense mutations previously reported from multiple sources as pathogenic or likely pathogenic</b> |                |           |          |                 |                                                               |                            |          |                           |                        |                            |                                                                                                   |
| <i>CDH23</i>                                                                                              | p.(Pro346Ser)  | c.1036C>T | homoz    | chr10:73377052  | congenital, severe to profound                                | 3                          |          | 0                         | 0                      | P                          |                                                                                                   |
| <i>CDH23</i>                                                                                              | p.(Pro346Ser)  | c.1037C>T | homoz    | chr10:73377053  | congenital, moderate                                          | 1                          |          | 0                         | 5                      | P                          |                                                                                                   |
| <i>CDH23</i>                                                                                              | p.(Pro559Ser)  | c.1675C>T | homoz    | chr10:73437373  | congenital, moderate to severe                                | 2                          |          | 0                         | 0                      | P                          |                                                                                                   |
| <i>CDH23</i>                                                                                              | p.(Glu1071Lys) | c.3211G>A | homoz    | chr10:73468959  | congenital, moderate                                          | 2                          |          | 0                         | 0                      | P                          |                                                                                                   |
| <i>COCH</i>                                                                                               | p.(Cys542Ser)  | c.1625G>C | het      | chr14:31358969  | onset ~age 20, moderate, progressive                          | 1                          |          | 0                         | 0                      | P                          |                                                                                                   |
| <i>ESPN</i>                                                                                               | p.(Ser719Arg)  | c.2155A>C | het      | chr1:6511986    |                                                               | 1                          |          | 0                         | 1                      | P                          |                                                                                                   |
| <i>GJB2</i>                                                                                               | p.(Trp77Arg)   | c.229T>C  | homoz    | chr13:20763492  | congenital, severe to profound                                | 1                          |          | 0                         | 10                     | P                          | Disulfide bond region, disrupts channel fcn                                                       |
| <i>LARS2</i>                                                                                              | p.(Asn153His)  | c.457A>C  | homoz    | chr3:45461162   | severe to profound with ovarian dys and neurological problems | 4                          |          | 1                         | 0                      | LP                         |                                                                                                   |
| <i>MYO6</i>                                                                                               | p.(Glu299Asp)  | c.897G>T  | homoz    | chr6:76554694   | congenital, profound                                          | 1                          |          | 0                         | 0                      | P                          |                                                                                                   |
| <i>MYO7A</i>                                                                                              | p.(Gly1298Arg) | c.3892G>A | homoz    | chr11:76901883  |                                                               | 1                          |          | 2                         | 0                      | LP                         |                                                                                                   |
| <i>MYO7A</i>                                                                                              | p.(Gly2163Ser) | c.6487G>A | homoz    | chr11:76924953  | congenital, moderate to profound                              | 6                          |          | 0                         | 7                      | P/LP                       |                                                                                                   |
| <i>MYO15A</i>                                                                                             | p.(Val2114Met) | c.6340G>A | homoz    | chr17:18049252  | congenital, severe to profound                                | 1                          |          | 1                         | 1                      | P                          | Also Yang 2013 (compound het with frameshift); no splice effect                                   |
| <i>MYO15A</i>                                                                                             | p.(Arg2728His) | c.8183G>A | homoz    | chr17:18058028  | congenital, severe to profound                                | 3                          |          | 1                         | 48                     | LP                         | Completely conserved site; compound het w/fs on ClinVar and in our cohort; no splice effect       |
| <i>PAX3</i>                                                                                               | p.(Arg271His)  | c.812G>A  | het      | chr2:223086087  | Waardenburg syn type I                                        | 1                          |          | 0                         | 0                      | P                          |                                                                                                   |
| <i>PAX3</i>                                                                                               | p.(Ser84Phe)   | c.251C>T  | het      | chr2:223161767  | Waardenburg syn type I                                        | 3                          |          | 0                         | 0                      | P                          |                                                                                                   |
| <i>PTRH2</i>                                                                                              | p.(Gln86Pro)   | c.254T>G  | homoz    | chr17: 57775086 | severe HL w/mild DD                                           | 2                          |          | 0                         | 0                      | P/LP                       |                                                                                                   |
| <i>SLC26A4</i>                                                                                            | p.(Ser133Thr)  | c.397T>A  | homoz    | chr7:107312675  | congenital, severe to profound                                | 1                          |          | 0                         | 1                      | LP                         | Missense on ClinVar; we predict enhancer effect                                                   |
| <i>SLC26A4</i>                                                                                            | p.(Val239Asp)  | c.716T>A  | homoz    | chr7:107315505  | congenital, severe to profound                                | 1                          |          | 1                         | 51                     | P                          | Damages protein fcn                                                                               |
| <i>SLC26A4</i>                                                                                            | p.(Gly497Ser)  | c.1489G>A | homoz    | chr7:107336429  | congenital, severe to profound                                | 1                          |          | 0                         | 7                      | P                          | Damages protein fcn                                                                               |
| <i>SLC26A4</i>                                                                                            | p.(Phe683Ser)  | c.2048T>C | homoz    | chr7:107344789  | congenital, moderate                                          | 2                          |          | 0                         | 2                      | P                          |                                                                                                   |
| <i>TECTA</i>                                                                                              | p.(Tyr1870Cys) | c.5609A>G | het      | chr11:121038785 | congenital, moderate to severe                                | 1                          |          | 0                         | 0                      | P/LP                       | Original DFNA8/12 mutation                                                                        |

**Table S5. Mutations with transcript effects. Predictions using approach of Casadei et al 2019. Effects were experimentally validated for genes expressed in available tissues**

| Gene    | cDNA               | Protein        | hg19 position  | NNSPLICE |        |         | MaxEnt |        |         | distance to splice sites | Mutation effect(s)                                                 | Transcript effect            | Protein effect                                              | Expt confirm in RNA | Co-seg P | Families with mutation |    |
|---------|--------------------|----------------|----------------|----------|--------|---------|--------|--------|---------|--------------------------|--------------------------------------------------------------------|------------------------------|-------------------------------------------------------------|---------------------|----------|------------------------|----|
|         |                    |                |                | ref      | mutant | cryptic | ref    | mutant | cryptic |                          |                                                                    |                              |                                                             |                     |          | gnomad                 |    |
| ADGRV1  | c.2898G>A          | p.(Glu966Glu)  | chr5:89940686  | 1.00     | 0.88   |         | 8.39   | 3.59   |         | E116411                  | disrupt splice donor exon 15                                       | del 164 bp                   | stop codon 931                                              | yes                 | 0.002    | 2                      | 0  |
| ADGRV1  | c.10426 G>A        | p.(Gly3476Arg) | chr5:90024750  | 0.96     | 0.26   | 0.58    | 6.95   | 2.17   | 5.35    | E126511                  | cryptic splice donor c.10216, exon 49 (chr5:90,024,540)            | del 210 bp                   | del aa 3407-3476 in EAR4 domain                             | yes                 | 0.012    | 1                      | 0  |
| CDC14A  | c.51-1G>T          | p.(?)          | chr1:100819317 | 0.87     | 0.00   |         | 11.01  | 2.41   |         |                          | disrupt splice acceptor exon 2                                     | del 91 bp                    | stop codon 25                                               | yes                 | sing     | 1                      | 0  |
| CLPP    | c.270+3G>T         | p.(?)          | chr19:6361954  | 0.96     | 0.54   |         | 8.69   | 1.83   |         |                          | disrupt splice donor exon 2; retain intron 2                       | del 72 bp; ins 505 bp        | del aa 67-90 Clp protease proteolytic subunit; stop cdm 128 | na                  | 0.105    | 1                      | 0  |
| DFNA5   | c.991-15_991-13del | p.(?)          | chr7:24746008  |          |        |         |        |        |         |                          | weaken polypyrimidine tract at exon 8 acceptor                     | del 193 bp                   | stop codon 372                                              | yes                 | to do    | 1                      |    |
| EDNRB   | c.1071+2T>C        | p.(?)          | chr13:78477289 | 0.90     | 0.00   |         | 8.76   | 1.01   |         |                          | disrupt splice donor exon 4                                        | del 205 bp                   | stop codon 317                                              | yes                 | sing     | 1                      | 0  |
| ESRRB   | c.787G>A           | p.(Gly263Ser)  | chr14:76949102 | 1.00     | 0.91   |         | 9.60   | 6.39   |         | E116211                  | disrupt splice donor exon 7                                        | del 162 bp                   | del aa 209-262 in transactivation domain                    | yes                 | 0.001    | 2                      | 1  |
| GJB2    | c.-23+1G>A         | p.(?)          | chr13:20766921 | 0.99     | 0.00   |         | 9.60   | 1.42   |         |                          | disrupt splice donor exon 1                                        | loss of transcript           | no protein                                                  | yes                 |          | 4                      |    |
| HSD17B4 | c.1842G>A          | p.(Lys614Lys)  | chr5:118862914 | 0.99     | 0.56   | 0.95    | 9.11   | 3.87   | 4.82    | E18711                   | disrupt splice donor exon 21; cryptic splice donor c.1842+70       | del 87 bp                    | del aa 586-614 in hydratase domain; stop codon 616          | yes                 | 0.141    | 1                      | 5  |
| LHFPL5  | c.*16+1G>A         | p.(?)          | chr6:35787241  | 0.98     | 0.00   |         | 11.11  | 2.93   |         |                          | disrupt splice donor exon 3 (3'UTR)                                | del 12 bp                    | extend 32 codons (PMID:30177809)                            | known allele        | sing     | 1                      | 0  |
| LRTOMT  | c.327C>T           | p.(Cys109Cys)  | chr11:71817225 | 0.94     |        | 0.83    | 8.68   |        | 7.39    | E1244132                 | cryptic splice donor at c.326 in exon 7                            | del 33 bp                    | del aa 110-120 in transmembrane domain                      | ne                  | 0.011    | 1                      | 0  |
| MYO6    | c.897G>T           | p.(Glu299Asp)  | chr6:76554694  | 0.36     | 0.00   |         | 7.13   | -2.49  |         | E18111                   | disrupt splice donor exon 10                                       | del 81 bp                    | del aa 275-301 in ATPase domain                             | yes                 | 9.77E-04 | 2                      | 0  |
| MYO7A   | c.4951G>A          | p.(Gly1651Ser) | chr11:72912591 |          |        |         |        |        |         | E199193                  | ESE loss and ESS gain exon 36                                      | del 191 bp                   | stop codon 1656                                             | yes                 | 0.079    | 1                      | 0  |
| MYO7A   | c.4153-2A>G        | p.(?)          | chr11:76905397 | 0.88     | 0.00   |         | 5.93   | -2.02  |         |                          | disrupt splice acceptor exon 32                                    | del 171 bp                   | del aa 1385-1441 in FERMI domain                            | known allele        |          | 3                      |    |
| MYO15A  | c.3609+985G>A      | p.(?)          | chr17:18026708 | 0.96     | 0.00   |         | 7.77   | -0.41  |         |                          | disrupt splice donor exon 1                                        | comp loss                    | cochlear and pituitary-specific isoform                     | ne                  |          | 9                      | 0  |
| MYO15A  | c.3866+1G>A        | p.(?)          | chr17:18029771 | 0.93     | 0.00   |         | 8.40   | 0.22   |         |                          | disrupt splice donor exon 5                                        | 110 bp                       | stop codon 1277                                             | ne                  | sing     | 1                      | 2  |
| MYO15A  | c.4142+5G>A        | p.(?)          | chr17:18034661 | 0.97     | 0.09   | 0.54    | 9.25   | 2.65   | 6.42    |                          | disrupt splice donor exon 9; cryptic donor splice exon 9           | 106 bp; del 70 bp            | stop codon 1360                                             | ne                  | 0.016    | 2                      | 0  |
| MYO15A  | c.4240G>A          | p.(Glu1414Lys) | chr17:18035800 |          |        |         |        |        |         | E134811                  | ESS gain exon 11                                                   | del 114 bp                   | del aa 1403-1440 in motor domain                            | ne                  | 7.32E-04 | 3                      | 1  |
| MYO15A  | c.6499T>C          | p.(Tyr2167His) | chr17:18049411 |          |        |         |        |        |         | E1226111                 | ESE loss exon 30                                                   | del 236 bp                   | stop codon 2095                                             | ne                  | sing     | 1                      | 7  |
| MYO15A  | c.6893G>A          | p.(Arg2298Gln) | chr17:18052203 |          |        |         |        |        |         | E1129164                 | ESE loss, ESS gain, exon 33                                        | del 192 bp                   | del aa 2256-2319 in tail domain                             | ne                  | 0.002    | 1                      | 2  |
| MYO15A  | c.7207G>T          | p.(Asp2403Tyr) | chr17:18052889 | 0.00     | 0.87   |         | 0.08   | 7.73   |         | E19016                   | cryptic splice donor c.7206, exon 35 (chr17:18,052,888)            | del 7 bp                     | stop codon 2414                                             | ne                  | 4.67E-17 | 13                     | 0  |
| MYO15A  | c.8309_8311del     | p.(Glu2770del) | chr17:18058506 |          |        |         |        |        |         | E184131                  | ESE loss exon 46                                                   | del 116 bp                   | stop codon 2803                                             | ne                  | 0.026    | 1                      | 0  |
| MYO15A  | c.8788+5G>T        | p.(?)          | chr17:18060549 | 0.38     | 0.00   |         | 3.29   | -3.85  |         |                          | disrupt splice donor exon 50                                       | del 75 bp                    | del aa 2906-2930 in SH3 domain                              | ne                  | 0.105    | 1                      | 0  |
| MYO15A  | c.9572G>A          | p.(Arg3191His) | chr17:18065953 |          |        |         |        |        |         | E155141                  | ESE loss, ESS gain, exon 58                                        | del 95 bp                    | stop codon 3189                                             | ne                  | 0.008    | 2                      | 10 |
| OTOA    | c.2017-2A>G        | p.(?)          | chr16:21739560 | 0.71     | 0.00   | 0.30    | 7.47   | -0.48  | 5.22    |                          | disrupt splice acceptor exon 20; cryptic splice acceptor c.2017-72 | del 191 bp; ins 71 bp        | stop codon 696; stop codon 751                              | yes                 | 0.016    | 2                      | 0  |
| SLC26A4 | c.284G>A           | p.(Gly95Glu)   | chr7:107303860 |          |        |         |        |        |         | E1120121                 | ESE loss; ESS gain exon 3                                          | del 140 bp                   | stop codon 134                                              | yes                 | 0.105    | 1                      | 0  |
| SLC26A4 | c.304G>A           | p.(Gly102Arg)  | chr7:107303880 | 0.99     | 0.82   |         | 10.57  | 6.91   |         | E114011                  | disrupt splice donor exon 3                                        | del 140 bp                   | stop codon 134                                              | yes                 | 0.002    | 1                      | 0  |
| SLC26A4 | c.397T>A           | p.(Ser133Thr)  | chr7:107312675 |          |        |         |        |        |         | E193119                  | ESE loss exon 4                                                    | del 111 bp                   | del aa 102-138 in TM domain                                 | yes                 | 0.016    | 1                      | 0  |
| SLC26A4 | c.1001G>T          | p.(Gly334Val)  | chr7:107323982 | 0.98     | 0.45   | 0.94    | 7.93   | 6.05   | 9.14    | E18311                   | (1) disrupt splice donor exon 8; (2) cryptic splice donor          | (1) del 83 bp; (2) ins 40 bp | (1) stop codon 311; (2) stop codon 355                      | yes                 | 6.86E-11 | 10                     | 2  |
| SLC26A4 | c.1341+1delG       | p.(?)          | chr7:107334926 |          |        |         | 7.08   | -5.81  |         | E11178                   | disrupt splice donor exon 11                                       | del 78 bp                    | del aa 422-446, complete TM domain                          | yes                 |          | 5                      | 4  |
| TBC1D24 | c.1114_1116del     | p.(Ser372del)  | chr16:2548369  |          |        |         |        |        |         | E1131127                 | ESE loss exon 4                                                    | del 159 bp                   | del aa 328-380 in TBC domain                                | yes                 | 0.047    | 1                      | 0  |
| TMC1    | c.1763+1G>T        | p.(?)          | chr9:75431127  | 0.52     | 0.00   |         | 6.99   | -1.51  |         |                          | disrupt splice donor exon 19                                       | del 68 bp                    | stop codon 600                                              | known allele        | sing     | 1                      | 0  |
| USH1C   | c.104+5G>C         | p.(?)          | chr11:17554797 | 0.99     | 0.23   |         | 9.09   | 1.17   |         |                          | disrupt splice donor exon 2                                        | del 68 bp                    | stop codon 29                                               | ne                  | 0.004    | 2                      | 0  |

ne: not expressed in available tissue  
na: family not available

**Table S6. Unpaired heterozygous mutations in probands with apparently recessive hearing loss**

| Gene                                                            | cDNA             | Chr                 | position<br>(hg19) | Type        | Family   | Family<br>type | Consang | Gene solving<br>family |
|-----------------------------------------------------------------|------------------|---------------------|--------------------|-------------|----------|----------------|---------|------------------------|
| <b>A. Families with no genetic diagnosis</b>                    |                  |                     |                    |             |          |                |         |                        |
| <i>GJB2</i>                                                     | p.(Thr8Met)      | c.23C>T (exon2)     | 13                 | 20,763,698  | missense | JM             | sing    | yes not solved         |
| <i>GJB2</i>                                                     | p.(Gly12Valfs*2) | c.35delG (exon2)    | 13                 | 20,763,686  | delFS    | A158           | sing    | no not solved          |
| <i>GJB2</i>                                                     | p.(Gly12Valfs*2) | c.35delG (exon2)    | 13                 | 20,763,686  | delFS    | AS-HH          | sing    | no not solved          |
| <i>GJB2</i>                                                     | p.(Gly12Val)     | c.35G>T (exon2)     | 13                 | 20,763,686  | missense | AS-II          | sing    | no not solved          |
| <i>GJB2</i>                                                     | p.(Tyr65Ser)     | c.194A>C (exon2)    | 13                 | 20,763,527  | missense | HZ             | sing    | yes not solved         |
| <i>GJB2</i>                                                     | p.(Arg98Trp)     | c.292C>T (exon2)    | 13                 | 20,763,429  | missense | HW             | sing    | yes not solved         |
| <i>GJB2</i>                                                     | p.(Met163Val)    | c.487A>G (exon2)    | 13                 | 20,763,234  | missense | H              | sing    | yes not solved         |
| <i>MYO15A</i>                                                   | p.(Arg2728His)   | c.8183G>A (exon44)  | 17                 | 18,058,028  | missense | GD             | sing    | no not solved          |
| <i>OTOG</i>                                                     | p.(Arg2485fs*)   | c.7454delG (exon43) | 11                 | 17,655,766  | delFS    | A173           | sing    | yes not solved         |
| <i>SLC26A5</i>                                                  | -                | c.971+2T>C (exon9)  | 7                  | 103,038,377 | splice   | A173           | sing    | yes not solved         |
| <i>TECTA</i>                                                    | p.(Cys1619*)     | c.4857C>A (exon14)  | 11                 | 121,031,011 | nonsense | FC14           | multi   | yes not solved         |
| <i>USH2A</i>                                                    | p.(Gly2313Cys)   | c.6937G>T (exon36)  | 1                  | 216,143,987 | missense | GA-M           | sing    | yes not solved         |
| <b>B. Families with hearing loss solved by a different gene</b> |                  |                     |                    |             |          |                |         |                        |
| <i>GJB2</i>                                                     |                  | c.-23+1A>C          | 13                 | 20,763,744  | splice   | IW             | multi   | yes <i>EPS8L2</i>      |
| <i>GJB2</i>                                                     | p.(Gly12Valfs*2) | c.35delG (exon2)    | 13                 | 20,763,686  | delFS    | AS-T           | multi   | yes <i>PCDH15</i>      |
| <i>GJB2</i>                                                     | p.(Gly12Valfs*2) | c.35delG (exon2)    | 13                 | 20,763,686  | delFS    | QS059          | multi   | yes <i>SLC26A4</i>     |
| <i>GJB2</i>                                                     | p.(Gly12Val)     | c.35G>T (exon2)     | 13                 | 20,763,686  | missense | JF             | multi   | yes <i>SLC26A4</i>     |
| <i>GJB2</i>                                                     | p.(Leu79Cysfs*3) | c.235delC (exon2)   | 13                 | 20,763,486  | delFS    | GR             | multi   | yes <i>SLC26A4</i>     |
| <i>GJB2</i>                                                     | p.(Leu90Pro)     | c.269T>C (exon2)    | 13                 | 20,763,452  | missense | AA-N           | multi   | yes <i>CDH23</i>       |
| <i>GJB2</i>                                                     | p.(Tyr97*)       | c.290dupA (exon2)   | 13                 | 20,763,430  | nonsense | AS-R           | sing    | yes <i>MYO7A</i>       |
| <i>GJB2</i>                                                     | p.(Met163Val)    | c.487A>G (exon2)    | 13                 | 20,763,234  | missense | JH             | multi   | no <i>MYO7A</i>        |
| <i>GJB2</i>                                                     | p.(Met163Val)    | c.487A>G (exon2)    | 13                 | 20,763,234  | missense | QS043          | sing    | yes <i>MYO7A</i>       |
